# Supplementary material for: Synthesis of N-aryl substituted, five- and six-membered azacycles using aluminum-amide complexes
Source: Royal Society of Chemistry journal article supplement (doi:10.1039/c4cc04111a), 2014-01-01

*Electronic Supplementary Information (ESI) for*

**Synthesis of *N*-Aryl Substituted, Five- and Six- membered Azacycles using Aluminum-amide complexes**

Balaji L. Korbad and Sang-Hyeup Lee\*

*Department of Life Chemistry, Catholic University of Daegu, Gyeongsan-si, Gyeongbuk 712-702, South Korea*

E-mail: [leeshh@cu.ac.kr](mailto:leeshh@cu.ac.kr)

**Contents**

|                                                                 |      |
|-----------------------------------------------------------------|------|
| General information.....                                        | S-2  |
| General experimental procedure .....                            | S-3  |
| Characterization data of products.....                          | S-4  |
| References.....                                                 | S-10 |
| <sup>1</sup> H and <sup>13</sup> C NMR spectra of products..... | S-11 |

## General information

All chemicals were obtained from commercial supplier and used without further purification. Anhydrous grade tetrahydrofuran, 2-methyltetrahydrofuran, tetrahydropyran, toluene, and xylene were purchased and used out of the bottle without further purification. **Caution!** *Trimethylaluminum is moisture sensitive and pyrophoric, and should be handled with great care. All transfers, storage, and reactions must be performed under an anhydrous atmosphere of pure nitrogen or argon. Since methane is liberated during the reaction, the authors recommend that the reactions should be carried out using the sealed tube and behind a blast shield.* Thin layer chromatography (TLC) was carried out using Merck 60 F<sub>254</sub> plates with a 0.25 mm thickness. Flash chromatography was carried out using Merck silica gel 60 (230-400 mesh) using ethyl acetate/hexanes as eluent. <sup>1</sup>H NMR (400 MHz and 600 MHz) and <sup>13</sup>C NMR (100 MHz and 150 MHz) spectra were recorded using Varian INOVA-399 (400 MHz) and Agilent VNMR (600 MHz) calibrated using tetramethylsilane as an internal reference. High resolution mass data were obtained from Korea Basic Science Institute (Daegu) on a Jeol JMS 700 high resolution mass spectrometer.

## General experimental procedure:

### Experimental procedure for the synthesis of azacycloalkanes 3 (Table 2)

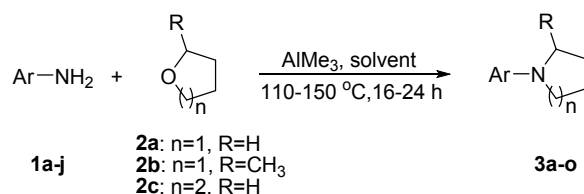

**N-phenylpyrrolidine (3a, entry 1):** Trimethylaluminum (0.6 mL, 2 M solution in toluene, 1.2 mmol) was added to a stirred solution of aniline (**1a**, 0.093 g, 1.0 mmol) in toluene (3 mL) at 0 °C under argon. After being stirred for 10 minute at 0 °C the resulting solution was warmed to room temperature, and stirred for 30 minutes. Then tetrahydrofuran **2a** (0.8 mL, 10.0 mmol) was added drop wise to the reaction mixture. The glass tube was then closed tightly with Teflon cap, and the resulting reaction mixture was heated to 110 °C for 16 h. The progress of the reaction was monitored by TLC. After completion of reaction, the reaction mixture was cooled to room temperature. Then the reaction was quenched by adding a mixture of THF:water (9:1, 2 mL) slowly under argon and the resulting suspension was stirred for an additional 10 minutes. Then it was filtered through the Celite® and further eluted with THF (5 mL). The combined filtrate was concentrated under reduced pressure and purification of the crude product by column chromatography (hexane:ethyl acetate = 30:1) gave **3a** (106 mg, 0.72 mmol, 72 %) as light yellow oil.

### Experimental procedure for the synthesis of tetrahydroisoquinolines and isoindolines 5 (Table 3)

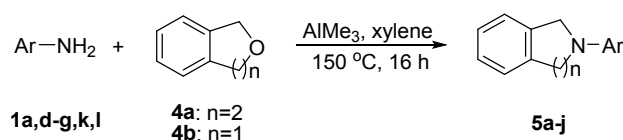

**2-phenyl-1,2,3,4-tetrahydroisoquinoline (5a, entry 1):** Trimethylaluminum (0.75 mL, 2 M solution in toluene, 1.5 mmol) was added to a stirred solution of aniline (**1a**, 0.186 g, 2.0 mmol) in xylene (4 mL) at 0 °C under argon. After being stirred for 10 minute at 0 °C the resulting solution was warmed to room temperature, and stirred for 30 minutes. Then isochroman **4a** (0.134 g, 1.0 mmol) was added to the reaction mixture at room temperature. Then glass tube was then closed tightly with Teflon cap, and the resulting reaction mixture was heated to 150 °C (bath temperature) for 16 h. The progress of the reaction was monitored by TLC. After completion of reaction, the reaction mixture was cooled to room temperature. Then the reaction was quenched by adding a mixture of THF:water (9:1, 3 mL) slowly under argon and the resulting suspension was stirred for an additional 10 minutes. Then it was filtered through the Celite® and further eluted with THF (10 mL). The combined filtrate was concentrated under reduced pressure and purification of the crude product by column chromatography (hexane:ethyl acetate, 20:1) gave **5a** (136 mg, 0.65 mmol, 65 %) as colorless oil.

## Characterization data of products:

### *N*-Phenylpyrrolidine<sup>1</sup> (3a):

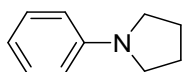

<sup>1</sup>H NMR (400 MHz, CDCl<sub>3</sub>): δ 2.22-2.12 (m, 4H), 3.52-3.39 (m, 4H), 6.77 (m, 2H), 6.87 (m, 1H), 7.39-7.47 (m, 2H); <sup>13</sup>C NMR (100 MHz, CDCl<sub>3</sub>): δ 25.9, 47.9, 112.1, 115.8, 129.5, 148.4. HRMS (EI<sup>+</sup>): *m/z* calcd for C<sub>10</sub>H<sub>13</sub>N [M-H]<sup>+</sup>, 146.0970, found 146.0973 (C<sub>10</sub>H<sub>12</sub>N<sup>+</sup>).

### *N-p*-Tolylpyrrolidine<sup>2</sup> (3b):

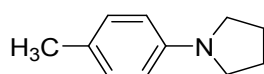

<sup>1</sup>H NMR (400 MHz, CDCl<sub>3</sub>): δ 2.08-2.19 (m, 4H), 2.44 (s, 3H), 3.34-3.47 (m, 4H), 6.67 (d, 2H, *J* = 8.4 MHz), 7.22 (d, 2H, *J* = 8.4 MHz); <sup>13</sup>C NMR (100 MHz, CDCl<sub>3</sub>): δ 20.7, 25.8, 48.2, 112.2, 124.7, 130.0, 146.5. HRMS (EI<sup>+</sup>): *m/z* calcd for C<sub>11</sub>H<sub>15</sub>N [M-H]<sup>+</sup>, 160.1126, found 160.1126 (C<sub>11</sub>H<sub>14</sub>N<sup>+</sup>).

### *N-o*-Tolylpyrrolidine<sup>2</sup> (3c):

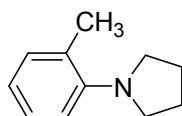

<sup>1</sup>H NMR (400 MHz, CDCl<sub>3</sub>): δ 2.00-2.12 (m, 4H), 2.47 (s, 3H), 3.24-3.38 (m, 4H), 6.93-7.06 (m, 2H), 7.20-7.31 (m, 2H); <sup>13</sup>C NMR (100 MHz, CDCl<sub>3</sub>): δ 20.9, 25.3, 51.3, 116.1, 120.6, 126.6, 129.0, 132.0, 149.7. HRMS (EI<sup>+</sup>): *m/z* calcd for C<sub>11</sub>H<sub>15</sub>N [M-H]<sup>+</sup>, 160.1126, found 160.1124 (C<sub>11</sub>H<sub>14</sub>N<sup>+</sup>).

### *N*-(3-Methoxyphenyl)pyrrolidine<sup>3</sup> (3d):

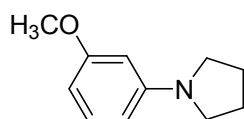

<sup>1</sup>H NMR (400 MHz, CDCl<sub>3</sub>): δ 2.01-2.18 (m, 4H), 3.32-3.45 (m, 4H), 3.89 (s, 3H), 6.22-6.26 (m, 1H), 6.29-6.35 (m, 1H), 6.36-6.39 (m, 1H), 7.21-7.29 (m, 1H); <sup>13</sup>C NMR (100 MHz, CDCl<sub>3</sub>): δ 25.8, 47.9, 55.3, 98.2, 100.8, 105.3, 130.1, 149.6, 161.1. HRMS (EI<sup>+</sup>): *m/z* calcd for C<sub>11</sub>H<sub>15</sub>ON [M-H]<sup>+</sup>, 176.1075, found 176.1072 (C<sub>11</sub>H<sub>14</sub>ON<sup>+</sup>).

### *N*-(4-Chlorophenyl) pyrrolidine<sup>3</sup> (3e):

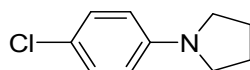

$^1\text{H}$  NMR (400 MHz,  $\text{CDCl}_3$ ):  $\delta$  1.85-2.09 (m, 4H), 3.19-3.32 (m, 4H), 6.47 (d, 2H,  $J = 7.2$  MHz), 7.17 (d, 2H,  $J = 7.2$  MHz);  $^{13}\text{C}$  NMR (100 MHz,  $\text{CDCl}_3$ ):  $\delta$  25.7, 47.9, 112.8, 120.2, 129.0, 146.7; HRMS (EI<sup>+</sup>):  $m/z$  calcd for  $\text{C}_{10}\text{H}_{12}\text{ClN}$   $[\text{M}-\text{H}]^+$ , 180.0580, found 180.0580 ( $\text{C}_{10}\text{H}_{11}\text{ClN}^+$ ).

***N*-(4-Fluorophenyl)pyrrolidine (3f):**

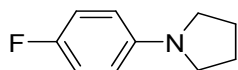

$^1\text{H}$  NMR (400 MHz,  $\text{CDCl}_3$ ):  $\delta$  1.85-2.10 (m, 4H), 3.19-3.33 (m, 4H), 6.47-6.55 (m, 2H), 6.95-7.04 (m, 2H);  $^{13}\text{C}$  NMR (100 MHz,  $\text{CDCl}_3$ ):  $\delta$  25.7, 48.3, 112.3 (d,  $J_{\text{CF}} = 7.4$  Hz), 115.5 (d,  $J_{\text{CF}} = 21.6$  Hz), 145.1 (d,  $J_{\text{CF}} = 5.2$  Hz), 155.1 (d,  $J_{\text{CF}} = 231.3$  Hz). HRMS (EI<sup>+</sup>):  $m/z$  calcd for  $\text{C}_{10}\text{H}_{12}\text{FN}$   $[\text{M}-\text{H}]^+$ , 164.0876, found 164.0874 ( $\text{C}_{10}\text{H}_{11}\text{FN}^+$ ).

***N*-(2,4-Difluorophenyl)pyrrolidine (3g):**

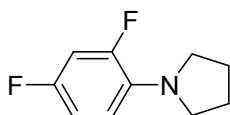

$^1\text{H}$  NMR (400 MHz,  $\text{CDCl}_3$ ):  $\delta$  1.89-1.97 (m, 4H), 3.20-3.34 (m, 4H), 6.57-6.62 (m, 1H), 6.69-6.79 (m, 2H);  $^{13}\text{C}$  NMR (150 MHz,  $\text{CDCl}_3$ ):  $\delta$  24.9 (d,  $J_{\text{CF}} = 1.7$  Hz), 49.9 (d,  $J_{\text{CF}} = 4.6$  Hz), 104.4 (dd,  $J_{\text{CF}} = 3.5, 26.0$  Hz), 110.4 (dd,  $J_{\text{CF}} = 3.5, 21.9$  Hz), 115.2 (dd,  $J_{\text{CF}} = 6.9, 9.2$  Hz), 134.3 (dd,  $J_{\text{CF}} = 3.5, 10.3$  Hz), 151.9 (dd,  $J_{\text{CF}} = 11.4, 243.8$  Hz), 154.8 (dd,  $J_{\text{CF}} = 11.4, 236.9$  Hz). HRMS (EI<sup>+</sup>):  $m/z$  calcd for  $\text{C}_{10}\text{H}_{11}\text{F}_2\text{N}$   $[\text{M}-\text{H}]^+$ , 182.0781, found 182.0782 ( $\text{C}_{10}\text{H}_{10}\text{F}_2\text{N}^+$ ).

***N*-(2-Bromo-4-fluorophenyl)pyrrolidine (3h):**

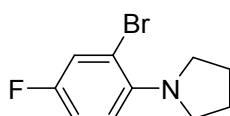

$^1\text{H}$  NMR (400 MHz,  $\text{CDCl}_3$ ):  $\delta$  1.80-1.99 (m, 4H), 3.09-3.35 (m, 4H), 6.80-6.97 (m, 2H), 7.25-7.32 (m, 1H);  $^{13}\text{C}$  NMR (100 MHz,  $\text{CDCl}_3$ ):  $\delta$  25.0, 51.7, 114.5 (d,  $J_{\text{CF}} = 21.5$  Hz), 115.1 (d,  $J_{\text{CF}} = 8.9$  Hz), 118.7 (d,  $J_{\text{CF}} = 8.2$  Hz), 121.3 (d,  $J_{\text{CF}} = 24.5$  Hz), 145.6 (d,  $J_{\text{CF}} = 1.5$  Hz), 157.1 (d,  $J_{\text{CF}} = 242.5$  Hz); HRMS (EI<sup>+</sup>):  $m/z$  calcd for  $\text{C}_{10}\text{H}_{11}\text{BrFN}$   $[\text{M}-\text{H}]^+$ , 241.9981, found 241.9984 ( $\text{C}_{10}\text{H}_{10}\text{BrFN}^+$ ).

***N*-(Naphthalen-1-yl)pyrrolidine<sup>3</sup> (3i):**

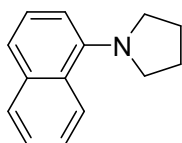

$^1\text{H}$  NMR (400 MHz,  $\text{CDCl}_3$ ):  $\delta$  1.84-2.00 (m, 4H), 3.22-3.38 (m, 4H), 6.85-6.95 (m, 1H), 7.25-7.33 (m, 1H), 7.34-7.45 (m, 3H), 7.70-7.81 (m, 1H), 8.13-8.23 (m, 1H);  $^{13}\text{C}$  NMR (100 MHz,  $\text{CDCl}_3$ ):  $\delta$  25.2, 53.1, 111.9, 121.7, 124.7, 125.3, 126.0, 126.4, 128.7, 128.8, 135.5, 148.2. HRMS (EI<sup>+</sup>):  $m/z$  cacl. for  $\text{C}_{14}\text{H}_{15}\text{N}$   $[\text{M}-\text{H}]^+$ , 196.1126; found 196.1129 ( $\text{C}_{14}\text{H}_{14}\text{N}^+$ ).

**9-Ethyl-3-(pyrrolidin-1-yl)-9H-carbazole (3j):**

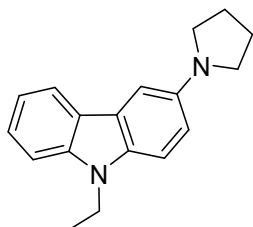

$^1\text{H}$  NMR (600 MHz,  $\text{CDCl}_3$ ):  $\delta$  1.39 (t, 3H,  $J = 7.8$  Hz), 2.02-2.15 (m, 4H), 3.30-3.55 (m, 4H), 4.31 (q, 2H,  $J = 7.8$  Hz), 6.88 (d, 1H,  $J = 8.4$  Hz), 7.13-7.20 (m, 1H), 7.26-7.37 (m, 3H), 7.40-7.45 (m, 1H), 8.06 (d, 1H,  $J = 7.8$  Hz);  $^{13}\text{C}$  NMR (150 MHz,  $\text{CDCl}_3$ ):  $\delta$  13.9, 25.4, 37.5, 49.0, 102.5, 108.3, 108.9, 112.7, 117.7, 120.4, 122.9, 123.8, 125.2, 133.1, 140.4, 142.6. HRMS (EI<sup>+</sup>):  $m/z$  cacl. for  $\text{C}_{18}\text{H}_{20}\text{N}_2$   $[\text{M}-\text{H}]^+$ , 263.1548; found 263.1551 ( $\text{C}_{18}\text{H}_{19}\text{N}_2^+$ ).

**2-Methyl-1-phenylpyrrolidine (3k):**

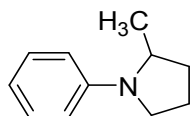

$^1\text{H}$  NMR (400 MHz,  $\text{CDCl}_3$ ):  $\delta$  1.32 (d, 3H,  $J = 6.0$  Hz), 1.78-1.89 (m, 1H), 2.02-2.28 (m, 3H), 3.22-3.25 (m, 1H), 3.49-3.58 (m, 1H), 3.95-4.07 (m, 1H), 6.73 (d, 1H,  $J = 8.0$  Hz), 6.79 (t, 2H,  $J = 8.0$  Hz), 7.02-7.41 (m, 2H);  $^{13}\text{C}$  NMR (100 MHz,  $\text{CDCl}_3$ ):  $\delta$  19.7, 23.7, 33.5, 48.5, 53.9, 112.1, 115.5, 129.5, 147.5. HRMS (EI<sup>+</sup>):  $m/z$  cacl. for  $\text{C}_{11}\text{H}_{15}\text{N}$   $[\text{M}]^+$ , 161.1204; found 161.1207.

**2-Methyl-1-(*p*-tolyl)pyrrolidine<sup>4</sup>(3l):**

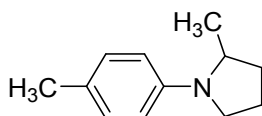

$^1\text{H}$  NMR (400 MHz,  $\text{CDCl}_3$ ):  $\delta$  1.22 (d, 3H,  $J = 6.0$  Hz), 1.73-1.82 (m, 1H), 1.95-2.23 (m, 3H), 2.32 (s, 3H), 3.15-3.23 (m, 1H), 3.41-3.50 (m, 1H), 3.82-3.95 (m, 1H), 6.58 (d, 2H,  $J = 8.4$  Hz), 7.09 (d, 2H,  $J = 8.0$  Hz);  $^{13}\text{C}$  NMR (100 MHz,  $\text{CDCl}_3$ ):  $\delta$  19.8, 20.5, 23.6, 33.4, 48.7, 54.0, 112.2, 124.5, 129.9, 145.6. HRMS (EI<sup>+</sup>):  $m/z$  cacl. for  $\text{C}_{12}\text{H}_{17}\text{N}$   $[\text{M}]^+$ , 175.1361; found 175.1360.

**1-(4-Fluorophenyl)-2-methylpyrrolidine (3m):**

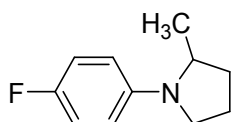

$^1\text{H}$  NMR (400 MHz,  $\text{CDCl}_3$ ):  $\delta$  1.03 (d, 3H,  $J = 6.0$  Hz), 1.52-1.59 (m, 1H), 1.78-2.00 (m, 3H), 2.93-3.02 (m, 1H), 3.21-3.30 (m, 1H), 3.62-3.72 (m, 1H), 6.33-6.39 (m, 2H), 6.78-6.85 (m, 2H);  $^{13}\text{C}$  NMR (100 MHz,  $\text{CDCl}_3$ ):  $\delta$  19.6, 23.7, 33.5, 48.9, 54.3, 112.5 (d,  $J_{\text{CF}} = 11.2$  Hz), 115.7 (d,  $J_{\text{CF}} = 21.6$  Hz), 144.3 (d,  $J_{\text{CF}} = 1.5$  Hz), 154.9 (d,  $J_{\text{CF}} = 232.0$  Hz). HRMS (EI+):  $m/z$  cacl. for  $\text{C}_{11}\text{H}_{14}\text{FN}$   $[\text{M}]^+$ , 179.1110; found 179.1109.

**N-Phenylpiperidine (3n):**

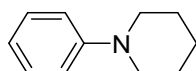

$^1\text{H}$  NMR (400 MHz,  $\text{CDCl}_3$ ):  $\delta$  1.566 (quin, 2H,  $J = 5.6$  Hz) 1.704 (quin, 4H,  $J = 5.6$  Hz), 3.14 (t, 4H,  $J = 5.6$  Hz), 6.81 (t, 1H,  $J = 7.6$  Hz), 6.93 (d, 2H,  $J = 7.6$  Hz), 7.20-7.27 (m, 2H);  $^{13}\text{C}$  NMR (100 MHz,  $\text{CDCl}_3$ ):  $\delta$  24.5, 26.1, 50.9, 116.7, 119.4, 129.3, 152.5. HRMS (EI+):  $m/z$  cacl. for  $\text{C}_{11}\text{H}_{15}\text{N}$   $[\text{M}-\text{H}]^+$ , 160.1126; found 160.1128 ( $\text{C}_{11}\text{H}_{14}\text{N}^+$ ).

**N-(4-Fluorophenyl)piperidine<sup>5</sup> (3o):**

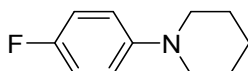

$^1\text{H}$  NMR (400 MHz,  $\text{CDCl}_3$ ):  $\delta$  1.527 (quin, 2H,  $J = 5.2$  Hz) 1.698 (quin, 4H,  $J = 5.2$  Hz), 3.03 (t, 4H,  $J = 5.2$  Hz), 6.81-6.88 (m, 2H), 6.89-6.97 (m, 2H);  $^{13}\text{C}$  NMR (100 MHz,  $\text{CDCl}_3$ ):  $\delta$  24.4, 26.2, 52.0, 115.5 (d,  $J_{\text{CF}} = 21.6$  Hz), 118.5 (d,  $J_{\text{CF}} = 7.4$  Hz), 149.3 (d,  $J_{\text{CF}} = 2.2$  Hz), 157.1 (d,  $J_{\text{CF}} = 236.5$  Hz). HRMS (EI+):  $m/z$  cacl. for  $\text{C}_{11}\text{H}_{14}\text{FN}$   $[\text{M}-\text{H}]^+$ , 178.1032; found 178.1034 ( $\text{C}_{11}\text{H}_{13}\text{FN}^+$ ).

**2-Phenyl-1,2,3,4-tetrahydroisoquinoline (5a):**

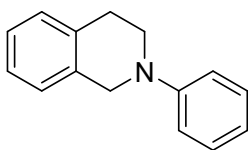

$^1\text{H}$  NMR (400 MHz,  $\text{CDCl}_3$ ):  $\delta$  2.94 (t, 2H,  $J = 5.6$  Hz), 3.51 (t, 2H,  $J = 5.6$  Hz), 4.37 (s, 2H), 6.75-6.85 (m, 1H), 6.88-7.20 (m, 3H), 7.06-7.19 (m, 3H), 7.22-7.32 (m, 2H);  $^{13}\text{C}$  NMR (100 MHz,  $\text{CDCl}_3$ ):  $\delta$  29.4, 46.8, 51.0, 115.5, 118.9, 126.3, 126.6, 126.9, 128.8, 129.5, 134.8, 135.2, 150.9. HRMS (EI+):  $m/z$  cacl. for  $\text{C}_{15}\text{H}_{15}\text{N}$   $[\text{M}]^+$ , 209.1204; found 209.1202.

**2-(3-Methoxyphenyl)-1,2,3,4-tetrahydroisoquinoline (5b):**

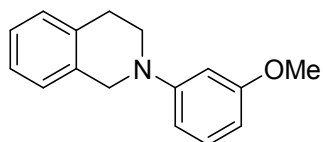

$^1\text{H}$  NMR (400 MHz,  $\text{CDCl}_3$ ):  $\delta$  2.96 (t, 2H,  $J = 5.6$  Hz), 3.54 (t, 2H,  $J = 5.6$  Hz), 3.78 (s, 3H), 4.39 (s, 2H), 6.38 (dd, 1H,  $J = 2.4$  and 2.4 Hz), 6.50 (t, 1H,  $J = 2.4$  Hz), 6.58 (dd, 1H,  $J = 2.4$  and 2.4 Hz), 7.11-7.22 (m, 5H);  $^{13}\text{C}$  NMR (100 MHz,  $\text{CDCl}_3$ ):  $\delta$  29.3, 46.6, 50.8, 55.4, 101.7, 103.5, 108.1, 126.3, 126.6, 126.8, 128.7, 130.1, 134.6, 135.1, 152.1, 160.9. HRMS (EI<sup>+</sup>):  $m/z$  cacl. for  $\text{C}_{16}\text{H}_{17}\text{NO}$   $[\text{M}]^+$ , 239.1310; found 239.1310.

**2-(4-Chlorophenyl)-1,2,3,4-tetrahydroisoquinoline (5c):**

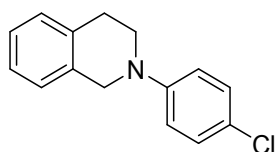

$^1\text{H}$  NMR (400 MHz,  $\text{CDCl}_3$ ):  $\delta$  2.96 (t, 2H,  $J = 5.6$  Hz), 3.51 (t, 2H,  $J = 5.6$  Hz), 4.36 (s, 2H), 6.79-6.91 (m, 2H), 7.08-7.26 (m, 6H);  $^{13}\text{C}$  NMR (100 MHz,  $\text{CDCl}_3$ ):  $\delta$  29.2, 46.7, 50.9, 116.4, 123.6, 126.4, 126.7, 126.8, 128.7, 129.2, 134.3, 134.9, 149.3. HRMS (EI<sup>+</sup>): ( $m/z$ ) cacl. for  $\text{C}_{15}\text{H}_{14}\text{ClN}$   $[\text{M}-\text{H}]^+$ , 242.0737; found 242.0738 ( $\text{C}_{15}\text{H}_{13}\text{ClN}^+$ ).

**2-(4-Fluorophenyl)-1,2,3,4-tetrahydroisoquinoline (5d):**

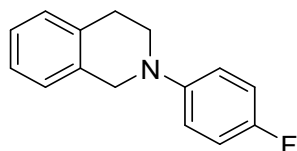

$^1\text{H}$  NMR (400 MHz,  $\text{CDCl}_3$ ):  $\delta$  2.98 (t, 2H,  $J = 5.6$  Hz), 3.48 (t, 2H,  $J = 5.6$  Hz), 4.33 (s, 2H), 6.85-7.03 (m, 4H), 7.11-7.23 (m, 4H);  $^{13}\text{C}$  NMR (100 MHz,  $\text{CDCl}_3$ ):  $\delta$  29.3, 47.9, 52.1, 115.8 (d,  $J_{\text{CF}} = 21.6$  Hz), 117.3, 117.4, 126.2, 126.7 (d,  $J_{\text{CF}} = 11.1$  Hz), 128.8, 134.5, 134.7, 147.6 (d,  $J_{\text{CF}} = 2.2$  Hz), 156.9 (d,  $J_{\text{CF}} = 236.5$  Hz). HRMS (EI<sup>+</sup>): ( $m/z$ ) cacl. for  $\text{C}_{15}\text{H}_{14}\text{FN}$   $[\text{M}-\text{H}]^+$ , 226.1032; found 226.1035 ( $\text{C}_{15}\text{H}_{13}\text{FN}^+$ ).

**2-(2-Fluorophenyl)-1,2,3,4-tetrahydroisoquinoline (5e):**

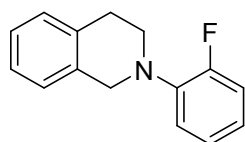

$^1\text{H}$  NMR (600 MHz,  $\text{CDCl}_3$ ):  $\delta$  2.95 (t, 2H,  $J = 6$  Hz), 3.41 (t, 2H,  $J = 6$  Hz), 4.27 (s, 2H), 6.86-6.92 (m, 1H), 6.94-7.17 (m, 7 H);  $^{13}\text{C}$  NMR (150 MHz,  $\text{CDCl}_3$ ):  $\delta$  28.9, 48.8 (d,  $J_{\text{CF}} = 4.6$  Hz), 52.5 (d,  $J_{\text{CF}} = 2.4$  Hz), 116.1 (d,  $J_{\text{CF}} = 20.7$  Hz), 119.3 (d,  $J_{\text{CF}} = 3.5$  Hz), 122.2 (d,  $J_{\text{CF}} = 7.9$  Hz), 124.3 (d,  $J_{\text{CF}} = 3.5$  Hz), 125.8, 126.2, 126.3, 128.8, 134.3, 134.4, 139.7 (d,  $J_{\text{CF}}$



= 9.3 Hz), 155.7 (d,  $J_{CF} = 244.9$  Hz) HRMS (EI<sup>+</sup>):  $m/z$  cacl. for  $C_{15}H_{14}FN$   $[M]^+$ , 227.1110; found 227.1107.

### 2-(2,4-Difluorophenyl)-1,2,3,4-tetrahydroisoquinoline (5f):

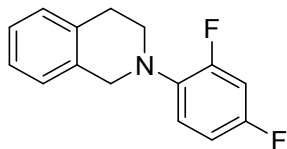

$^1H$  NMR (600 MHz,  $CDCl_3$ ):  $\delta$  2.95 (t, 2H,  $J = 6$  Hz), 3.34 (t, 2H,  $J = 6$  Hz), 4.21 (s, 2H), 6.73-6.84 (m, 2H), 6.90-6.96 (m, 1H), 7.04-7.08 (m, 1H), 7.10-7.17 (m, 3H);  $^{13}C$  NMR (150 MHz,  $CDCl_3$ ):  $\delta$  28.8, 49.2 (d,  $J_{CF} = 3.4$  Hz), 52.9 (d,  $J_{CF} = 2.4$  Hz), 104.7 (t,  $J_{CF} = 24$  Hz), 110.6 (dd,  $J_{CF} = 21.9, 3.4$  Hz), 119.9 (dd,  $J_{CF} = 9.3, 3.5$  Hz), 125.9, 126.26, 126.33, 128.7, 134.15, 134.20, 136.4 (dd,  $J_{CF} = 9.3, 3.5$  Hz), 155.7 (dd,  $J_{CF} = 11.4, 248.4$  Hz), 157.7 (dd,  $J_{CF} = 11.6, 241.4$  Hz). HRMS (EI<sup>+</sup>):  $m/z$  cacl. for  $C_{15}H_{13}F_2N$   $[M-H]^+$ , 244.0938; found 244.0940 ( $C_{15}H_{13}FN^+$ ).

### 2-(Pentafluorophenyl)-1,2,3,4-tetrahydroisoquinoline (5g):

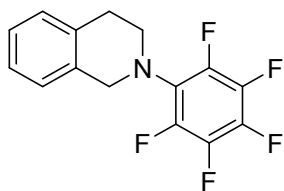

$^1H$  NMR (400 MHz,  $CDCl_3$ ):  $\delta$  2.97 (t, 2H,  $J = 5.6$  Hz), 3.47 (t, 2H,  $J = 5.6$  Hz), 4.37 (s, 2H), 6.99-7.06 (m, 1H), 7.10-7.20 (m, 3H);  $^{13}C$  NMR (100 MHz,  $CDCl_3$ ):  $\delta$  29.8, 49.4, 53.1, 126.1, 126.2, 126.6, 129.4, 134.2, 134.3. HRMS (EI<sup>+</sup>): ( $m/z$ ) cacl. for  $C_{15}H_{10}F_5N$   $[M]^+$ , 299.0733; found 299.0731.

### 2-Phenylisoindoline (5h):

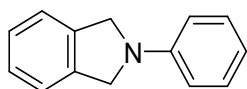

$^1H$  NMR (400 MHz,  $CDCl_3$ ):  $\delta$  4.65 (s, 4H), 6.65-6.7 (m, 2H), 6.72-6.77 (m, 1H), 7.26-7.37 (m, 6H);  $^{13}C$  NMR (100 MHz,  $CDCl_3$ ):  $\delta$  53.9, 111.8, 116.4, 122.8, 127.4, 129.6, 138.2, 147.4. HR-MS (EI<sup>+</sup>):  $m/z$  cacl. for  $C_{14}H_{13}N$   $[M-H]^+$ , 194.0970; found 194.0973 ( $C_{14}H_{12}N^+$ ).

### 2-(4-Chlorophenyl)isoindoline (5i):

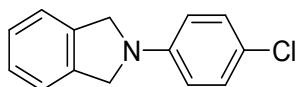

$^1\text{H}$  NMR (400 MHz,  $\text{CDCl}_3$ ):  $\delta$  4.61 (s, 4H), 6.57 (d, 2H,  $J = 8.8$  Hz), 7.23 (d, 2H,  $J = 8.8$  Hz), 7.25-7.38 (m, 4H);  $^{13}\text{C}$  NMR (100 MHz,  $\text{CDCl}_3$ ):  $\delta$  54.1, 112.8, 121.3, 122.8, 127.5, 129.3, 137.8, 146.1. HR-MS (EI+):  $m/z$  calcd. for  $\text{C}_{14}\text{H}_{12}\text{ClN}$   $[\text{M}-\text{H}]^+$ , 228.0580; found 228.0577 ( $\text{C}_{14}\text{H}_{11}\text{ClN}^+$ ).

**2-(4-Fluorophenyl)isoindoline (5j):**

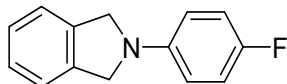

$^1\text{H}$  NMR (400 MHz,  $\text{CDCl}_3$ ):  $\delta$  4.58 (s, 4H), 6.50-6.59 (m, 2H), 6.95-7.05 (m, 2H), 7.24-7.39 (m, 4H);  $^{13}\text{C}$  NMR (100 MHz,  $\text{CDCl}_3$ ):  $\delta$  54.4, 112.2 (d,  $J_{\text{CF}} = 7.4$  Hz), 116.1 (d,  $J_{\text{CF}} = 22.3$  Hz), 122.7, 127.4, 138.1, 144.1 (d,  $J_{\text{CF}} = 1.5$  Hz), 155.4 (d,  $J_{\text{CF}} = 232.8$  Hz). HR-MS (EI+):  $m/z$  calcd. for  $\text{C}_{14}\text{H}_{12}\text{FN}$   $[\text{M}-\text{H}]^+$ , 212.0876; found 212.0878 ( $\text{C}_{14}\text{H}_{11}\text{FN}^+$ ).

**References:**

1. J. M. Flaniken, C. J. Collins, M. Lanz and B. Singaram, *Org. Lett.*, 1999, **1**, 799.
2. G. Manolikakes, A. Gavryushin and P. Knochel, *J. Org. Chem.*, 2008, **73**, 1429.
3. C.-Y. Gao and L.-M. Yang, *J. Org. Chem.*, 2008, **73**, 1624.
4. R. P. Rucker, A. M. Whittaker, H. Dang and G. Lalic, *Angew. Chem. Int. Ed.*, 2012, **51**, 3953.
5. L. Djakovitch, M. Wagner and K. Kohler, *J. Organomet. Chem.*, 1999, **592**, 225.

$^1\text{H}$  NMR and  $^{13}\text{C}$  NMR Spectra of the products

blk-002-021  
File: BLK-002-021-hmr-120614  
Pulse Sequence: s2pu1

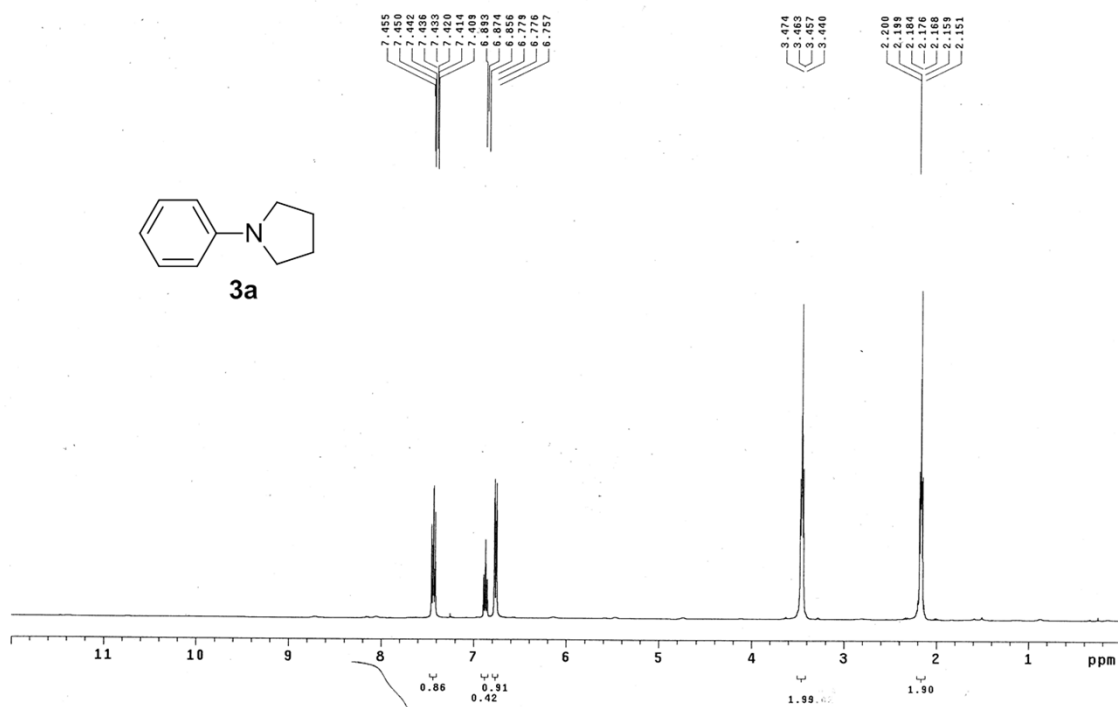

blk-002-021  
File: BLK-002-021-cnmr-120614  
Pulse Sequence: s2pu1

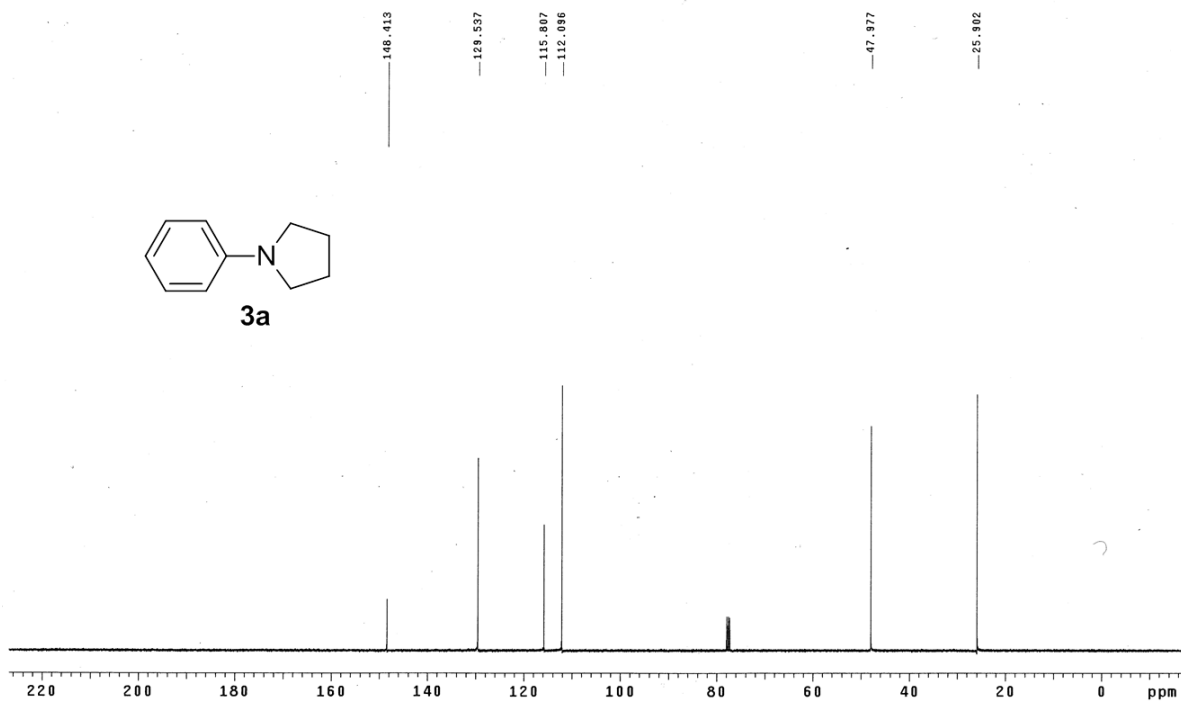

blk-002-023  
File: BLK-002-023-hnmr-120620  
Pulse Sequence: s2pu1

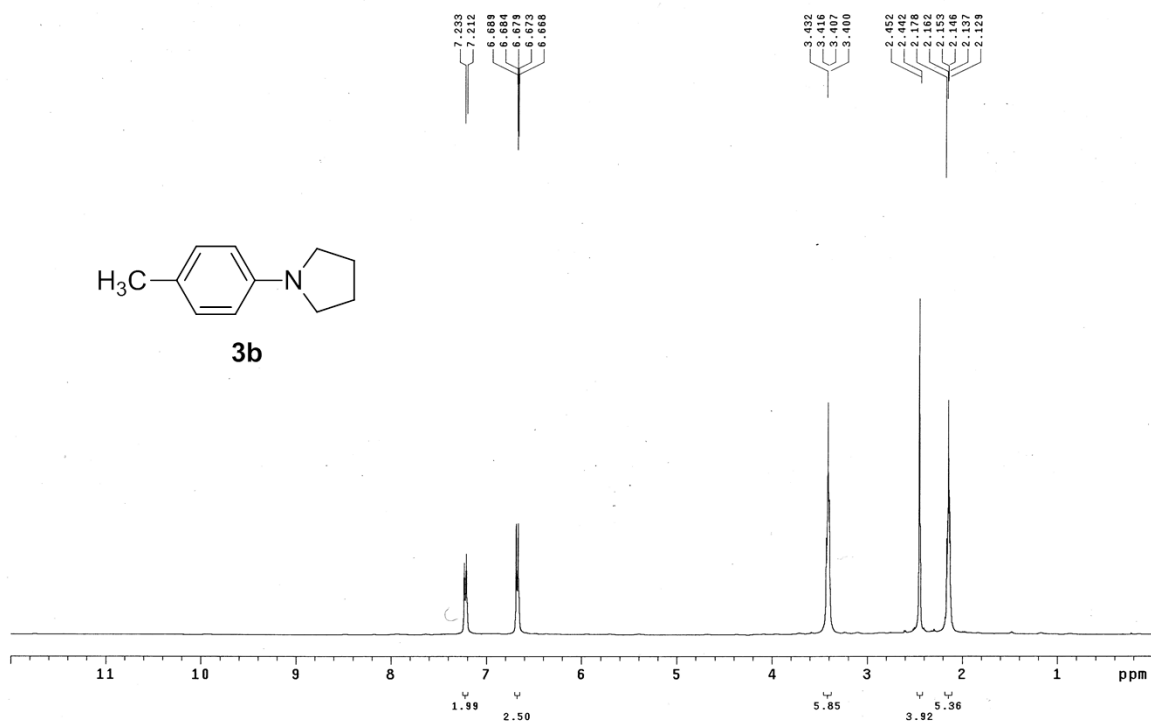

blk-002-023  
File: BLK-002-023-cnmr-120620  
Pulse Sequence: s2pu1

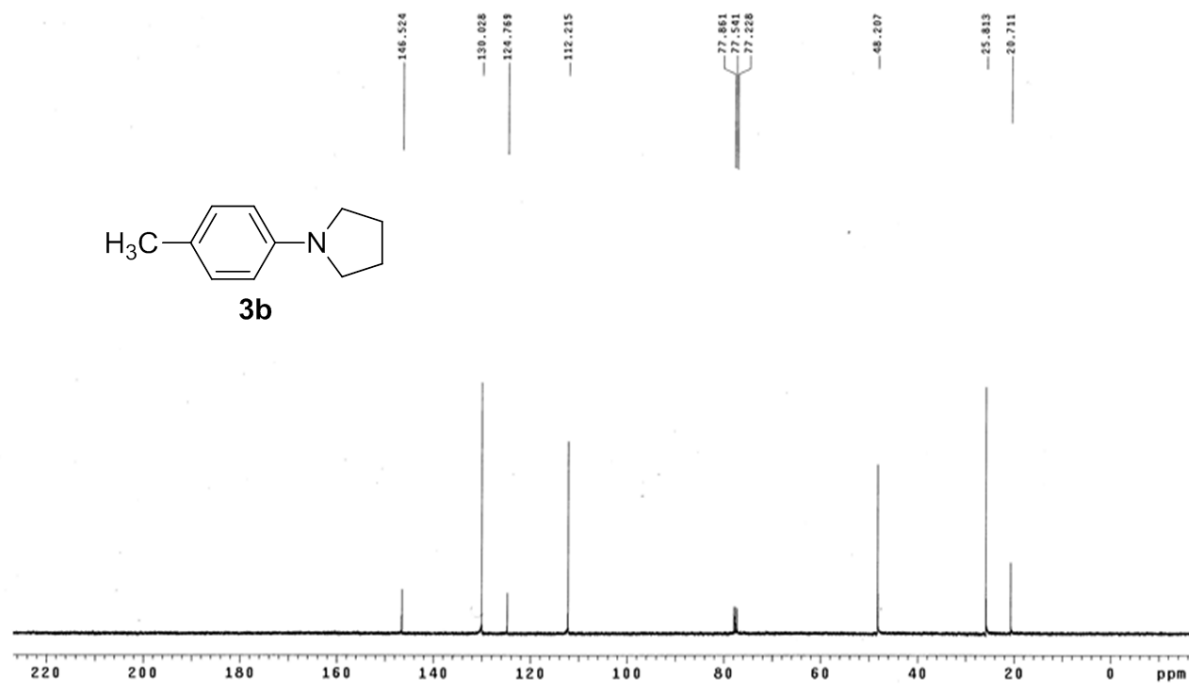

blk-002-032

File: BLK-002-032-hnmr-120712

Pulse Sequence: s2pu1

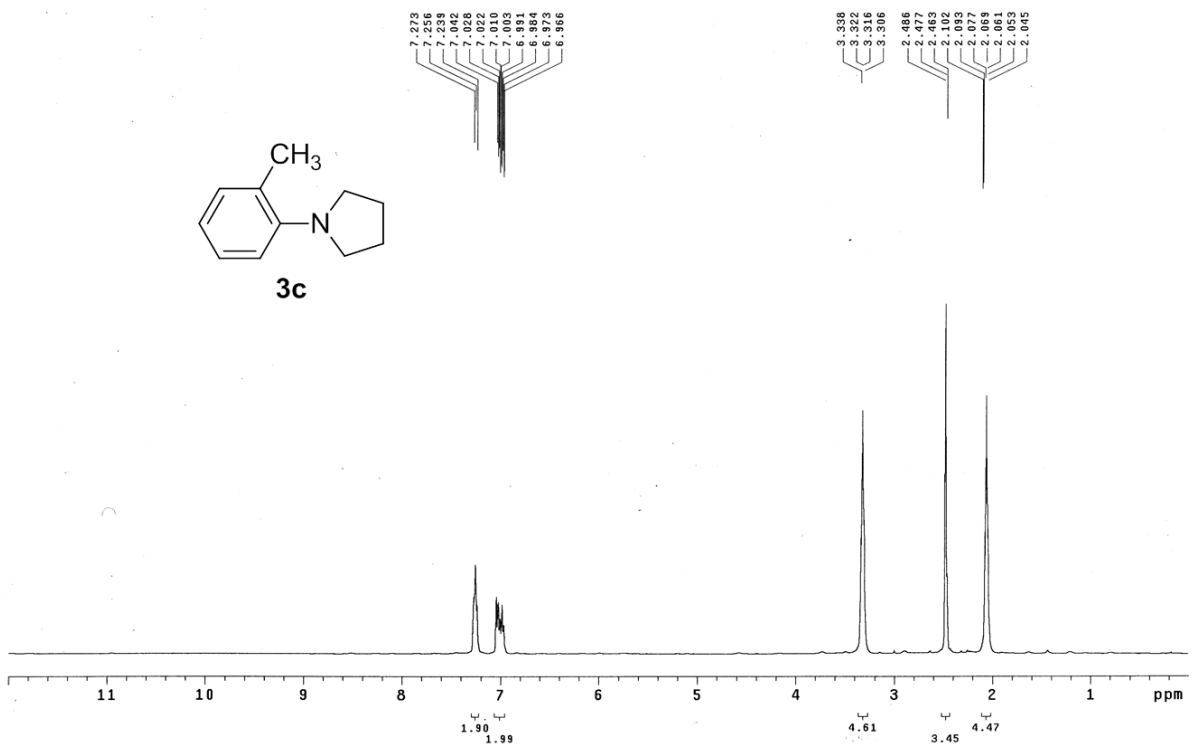

blk-002-032

File: BLK-002-032-cnmr-120712

Pulse Sequence: s2pu1

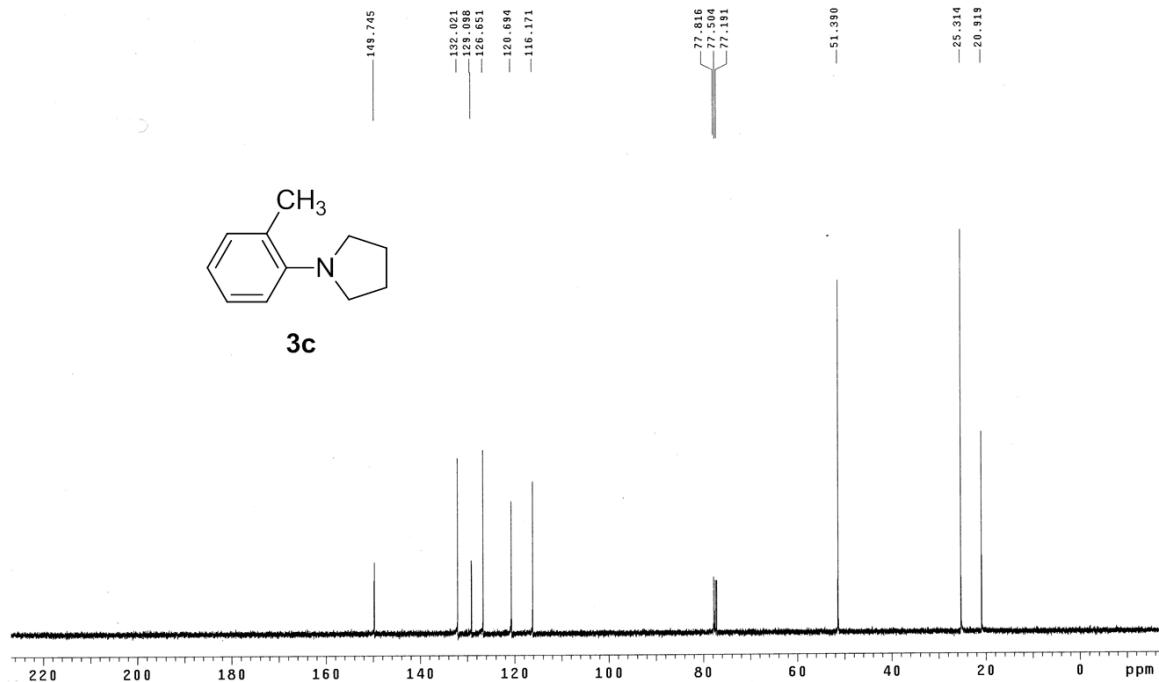

blk-002-033

File: BLK-002-033-hnmr-120712

Pulse Sequence: s2pu1

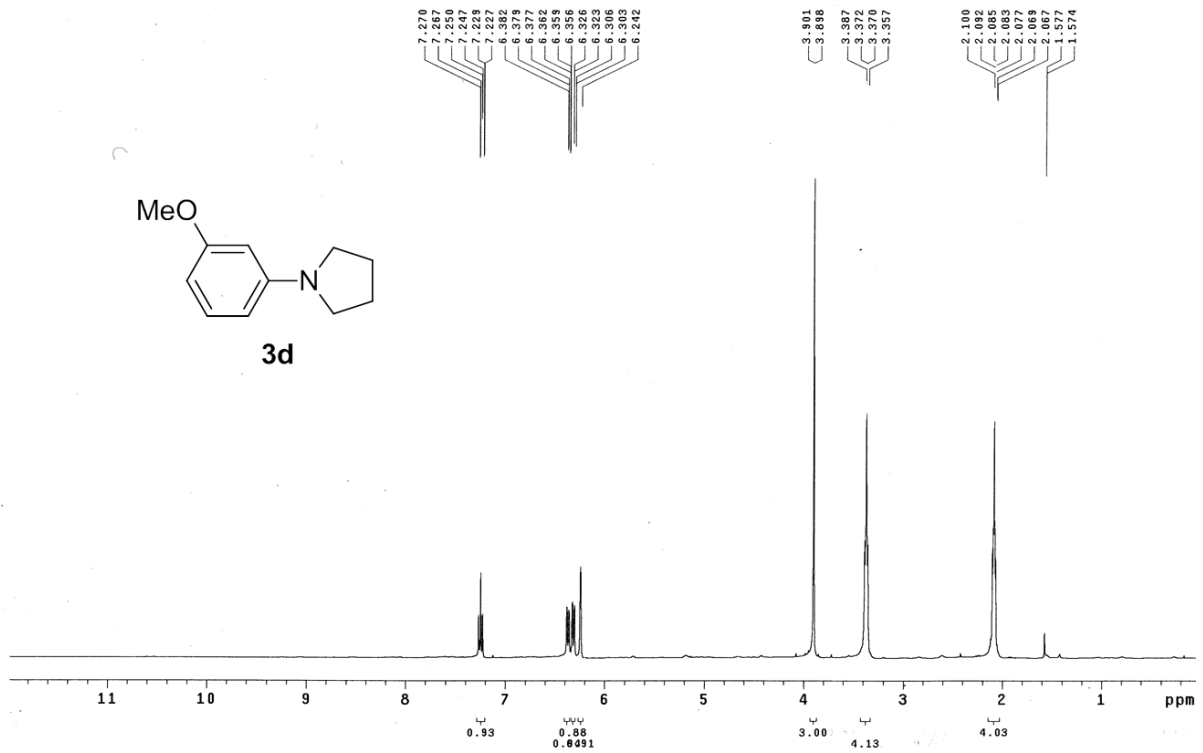

blk-002-033

File: BLK-002-033-cnmr-120712

Pulse Sequence: s2pu1

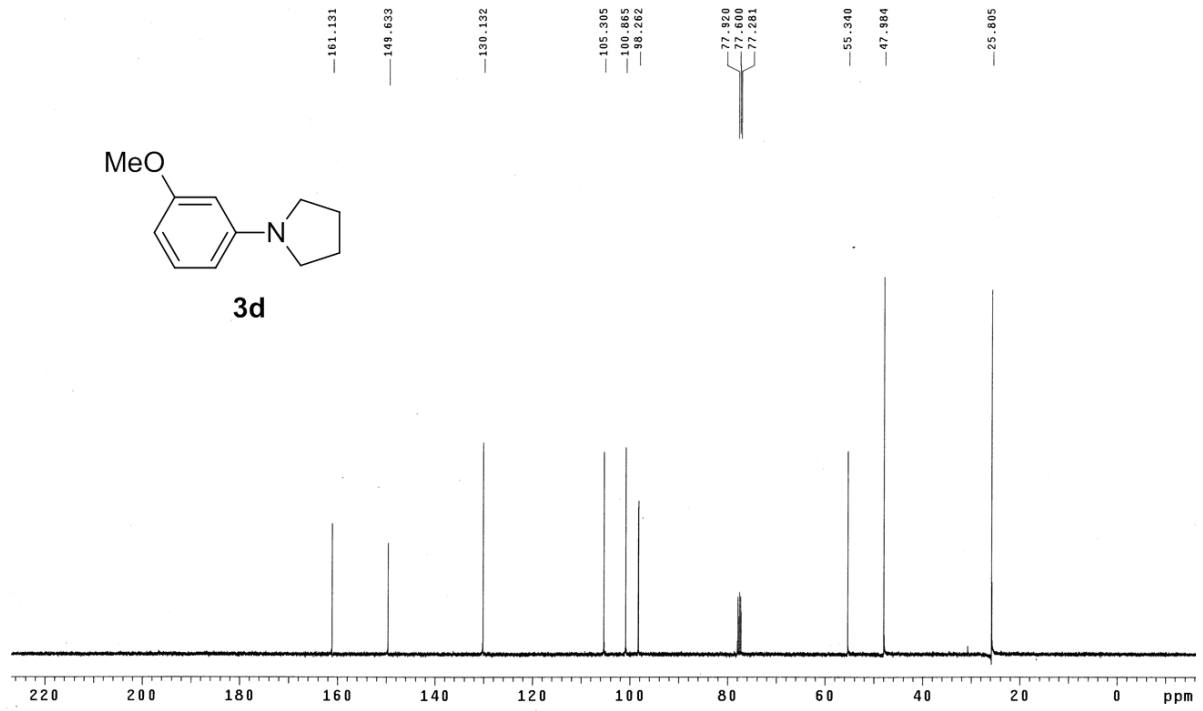

blk-002-025  
File: BLK-002-025-hnmr-120621  
Pulse Sequence: s2pu1

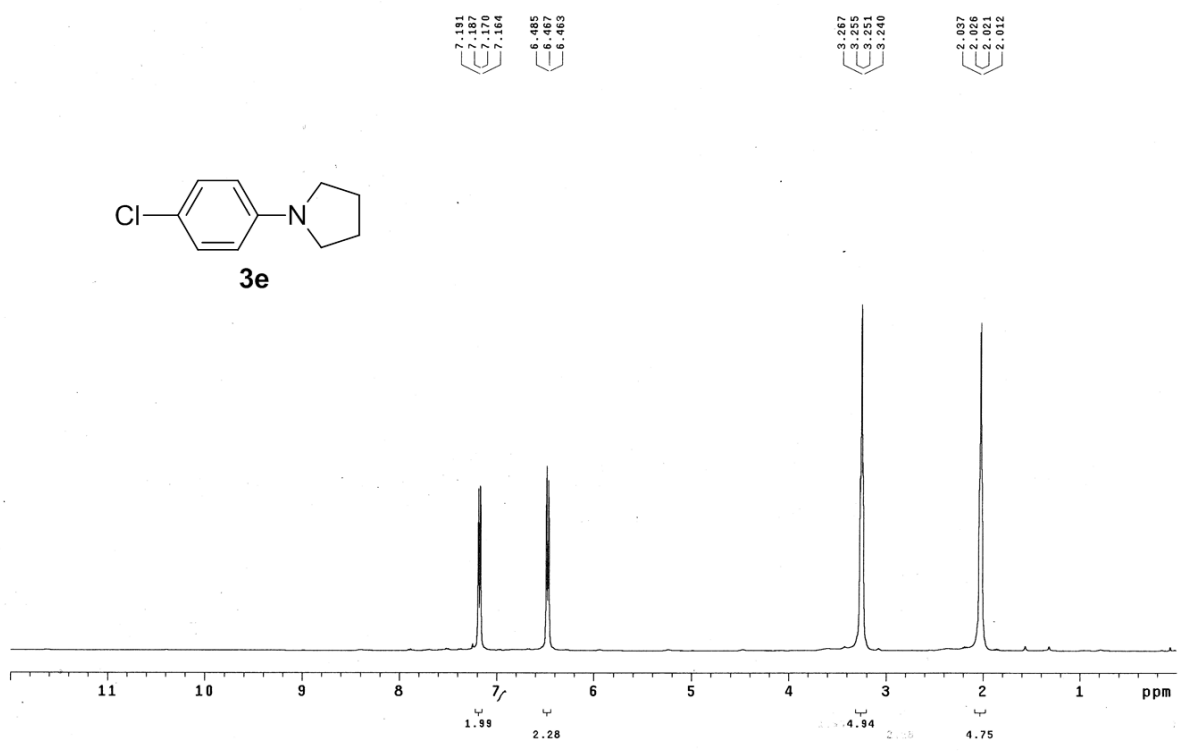

blk-002-025  
File: BLK-002-025-cnmr-120621  
Pulse Sequence: s2pu1

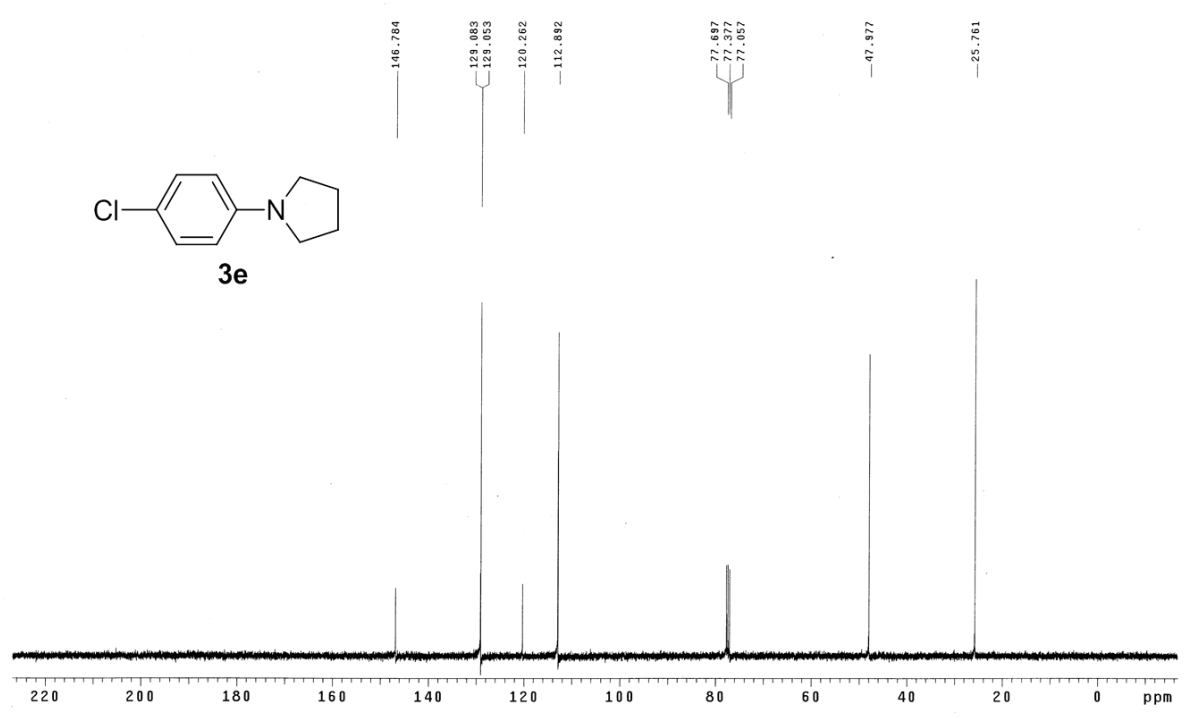



blk-002-022

File: BLK-002-022-hnmr-120620

Pulse Sequence: s2pu1

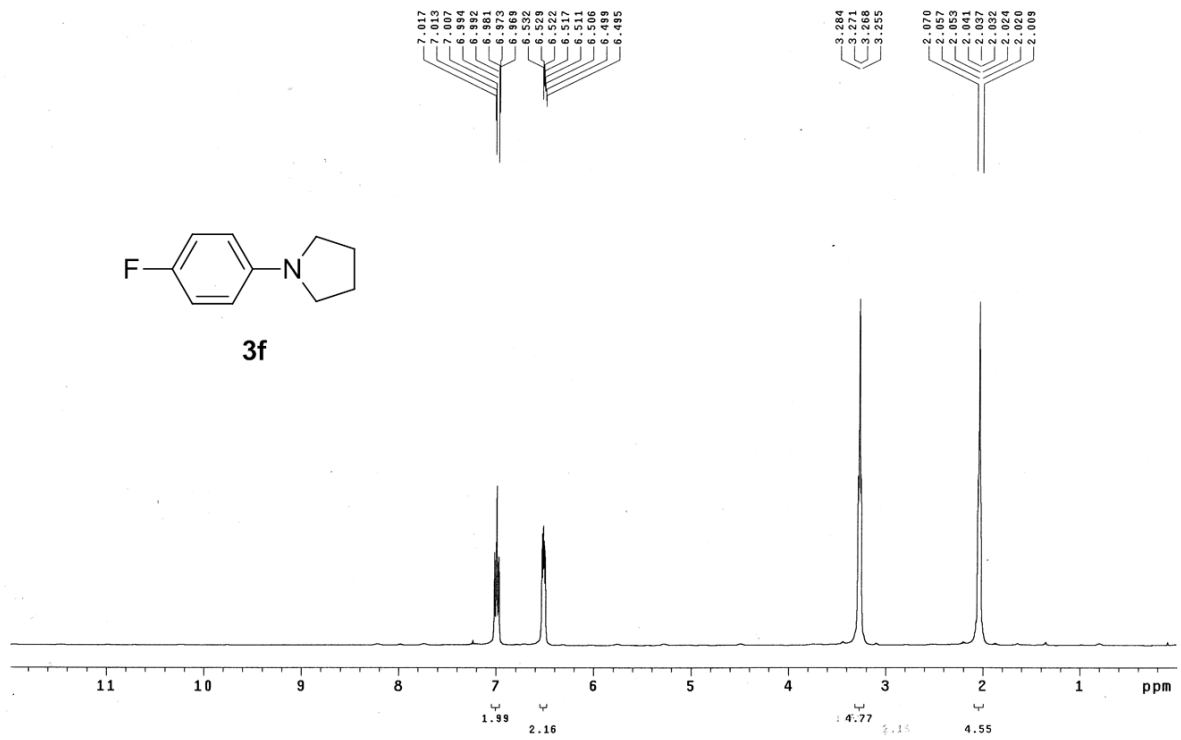

blk-002-022

File: BLK-002-022-cnmr-120620

Pulse Sequence: s2pu1

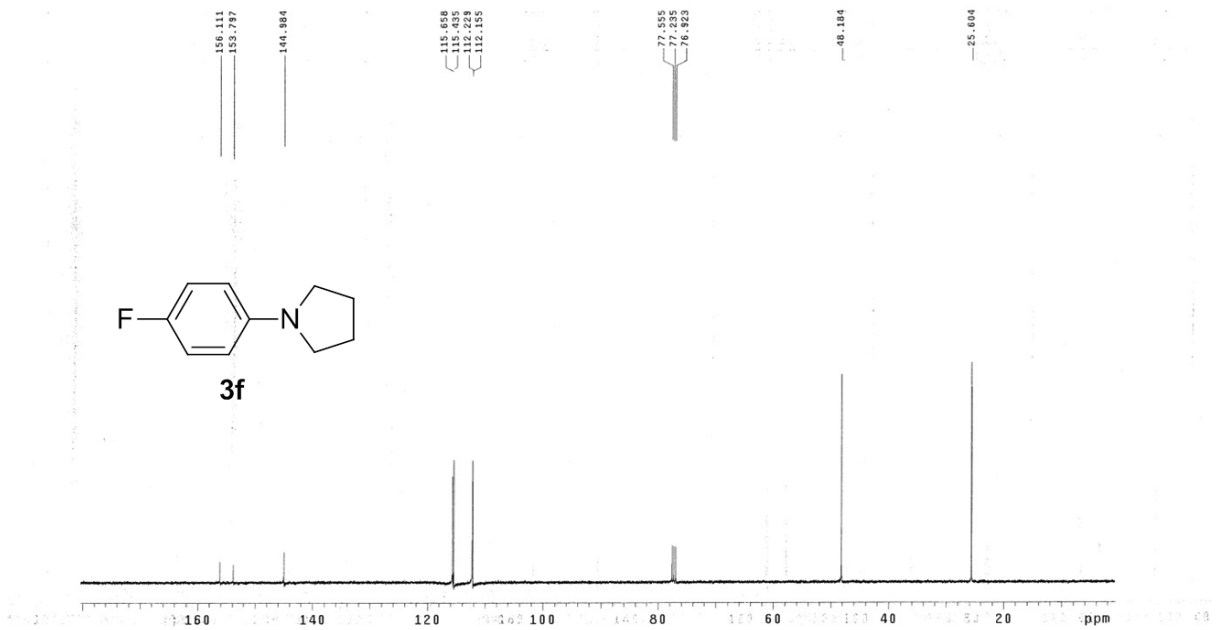

SpinWorks 3: 1.BLK-002-046A

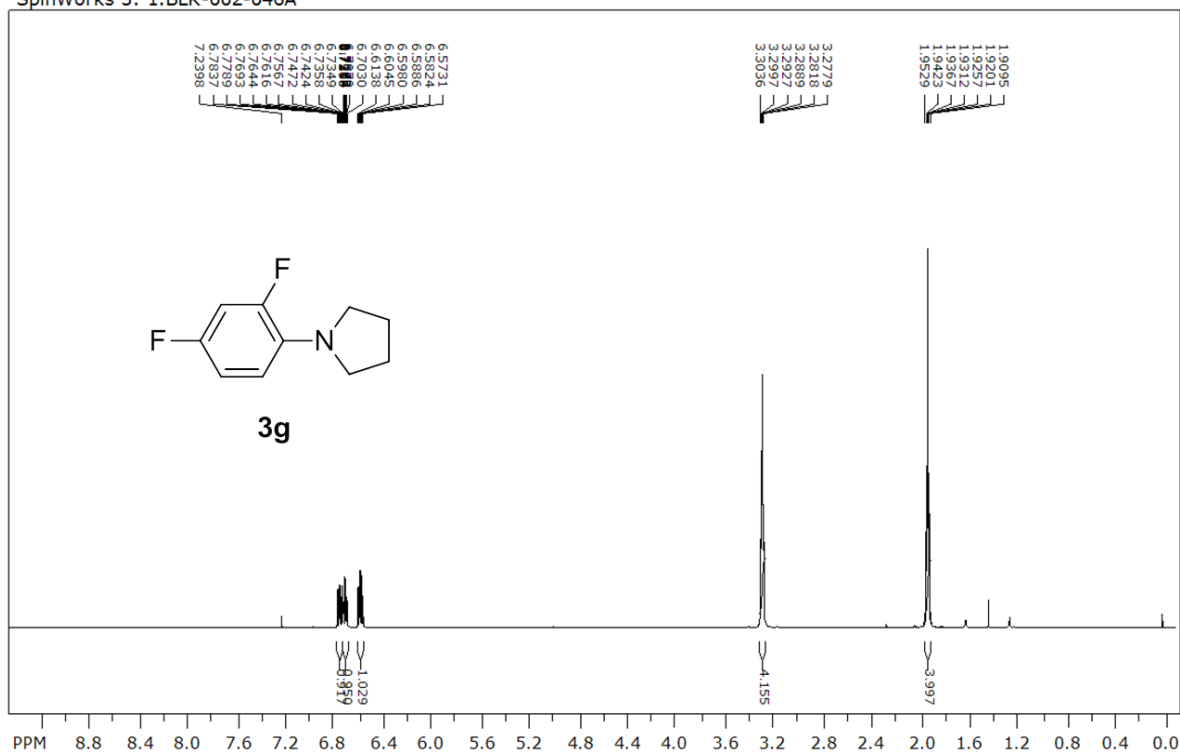

file: ...NMR\12sep21\1blk-002-046a.fid\fid block# 1 expt: "s2pul"  
 transmitter freq.: 599.859519 MHz  
 time domain size: 32768 points  
 width: 9615.38 Hz = 16.0294 ppm = 0.293438 Hz/pt  
 number of scans: 4

freq. of 0 ppm: 599.855932 MHz  
 processed size: 32768 complex points  
 LB: 0.000 GF: 0.0000  
 Hz/cm: 230.134 ppm/cm: 0.38365

SpinWorks 3: 1.BLK-002-046A

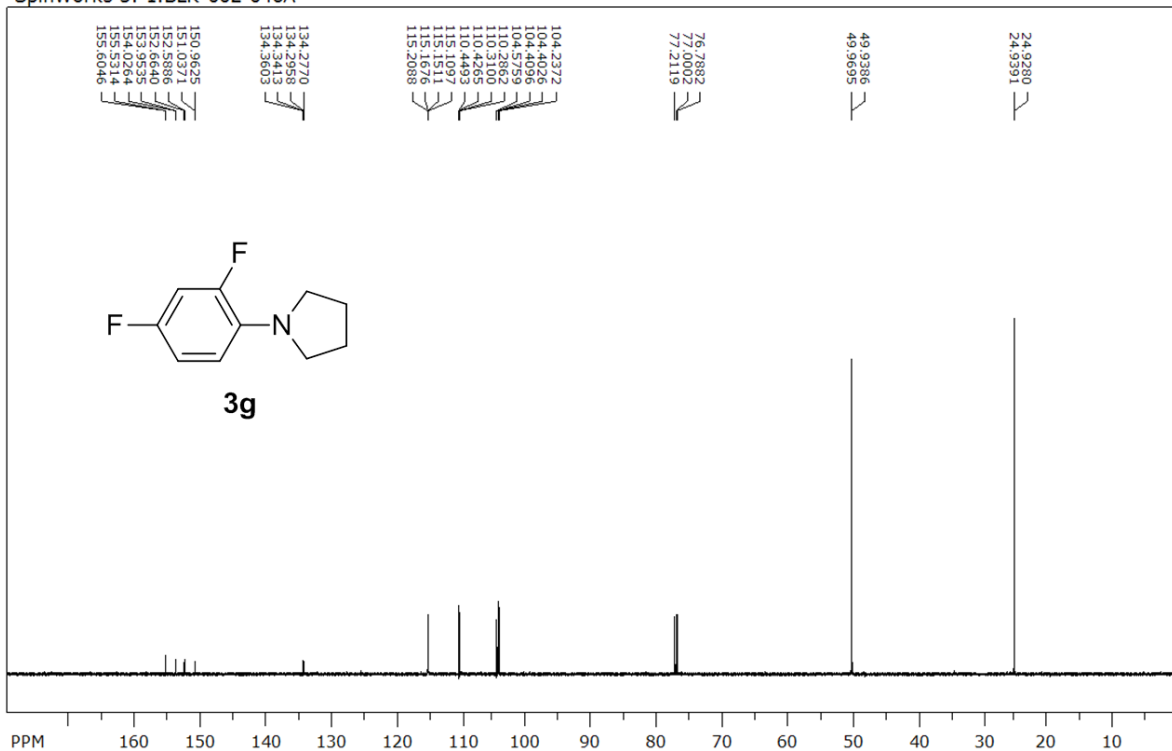

file: ...12sep21\1blk-002-046a\_13C.fid\fid block# 1 expt: "s2pul"  
 transmitter freq.: 150.850483 MHz  
 time domain size: 65536 points  
 width: 37878.79 Hz = 251.1015 ppm = 0.577984 Hz/pt  
 number of scans: 72

freq. of 0 ppm: 150.833896 MHz  
 processed size: 65536 complex points  
 LB: 0.000 GF: 0.0000  
 Hz/cm: 1086.902 ppm/cm: 7.20516

blk-002-027  
File: BLK-002-027-hnmr-120622  
Pulse Sequence: s2pu1

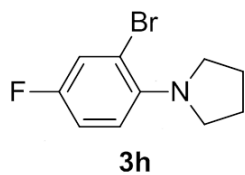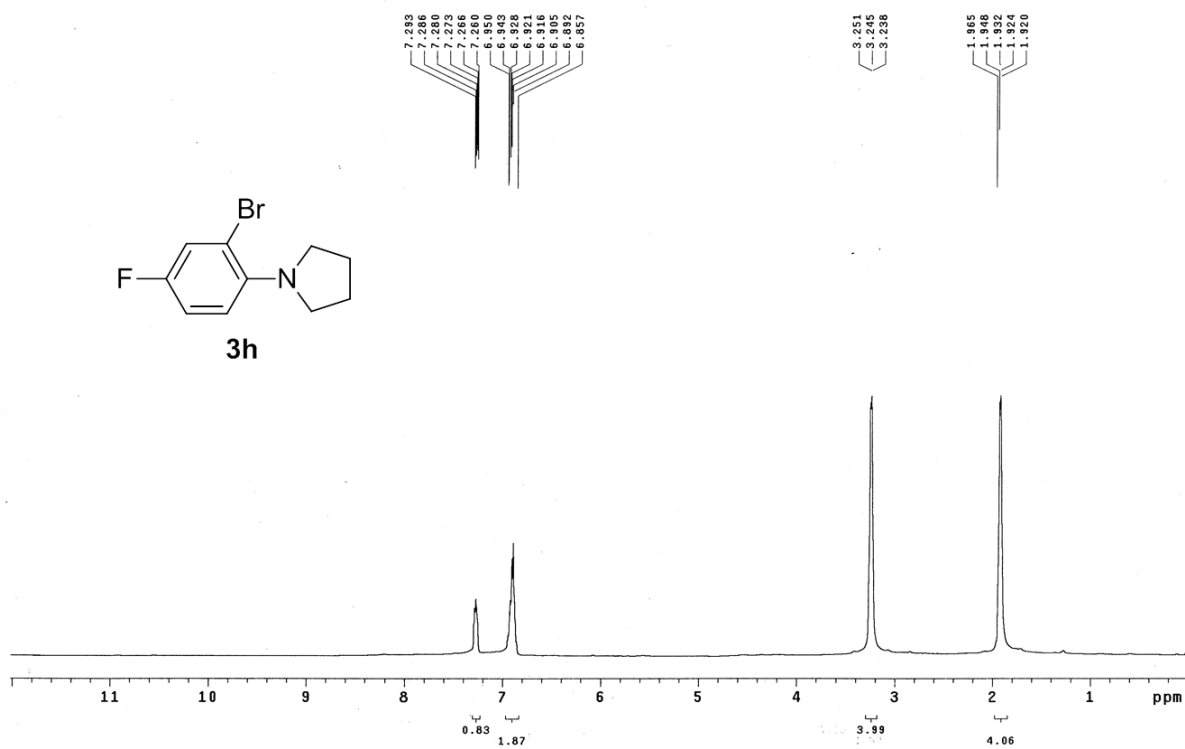

blk-002-027  
File: BLK-002-027-cnmr-120622  
Pulse Sequence: s2pu1

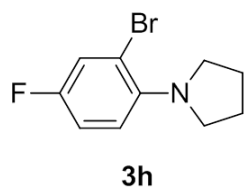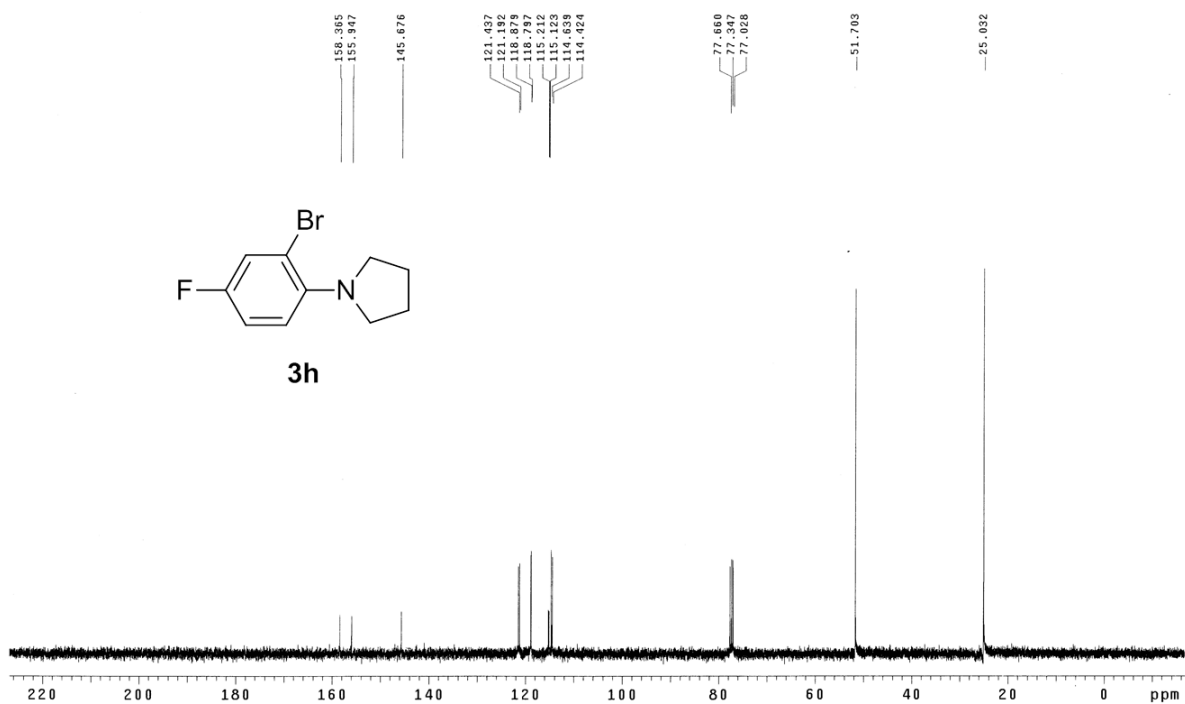

blk-002-031a  
File: Proton  
Pulse Sequence: s2pu1

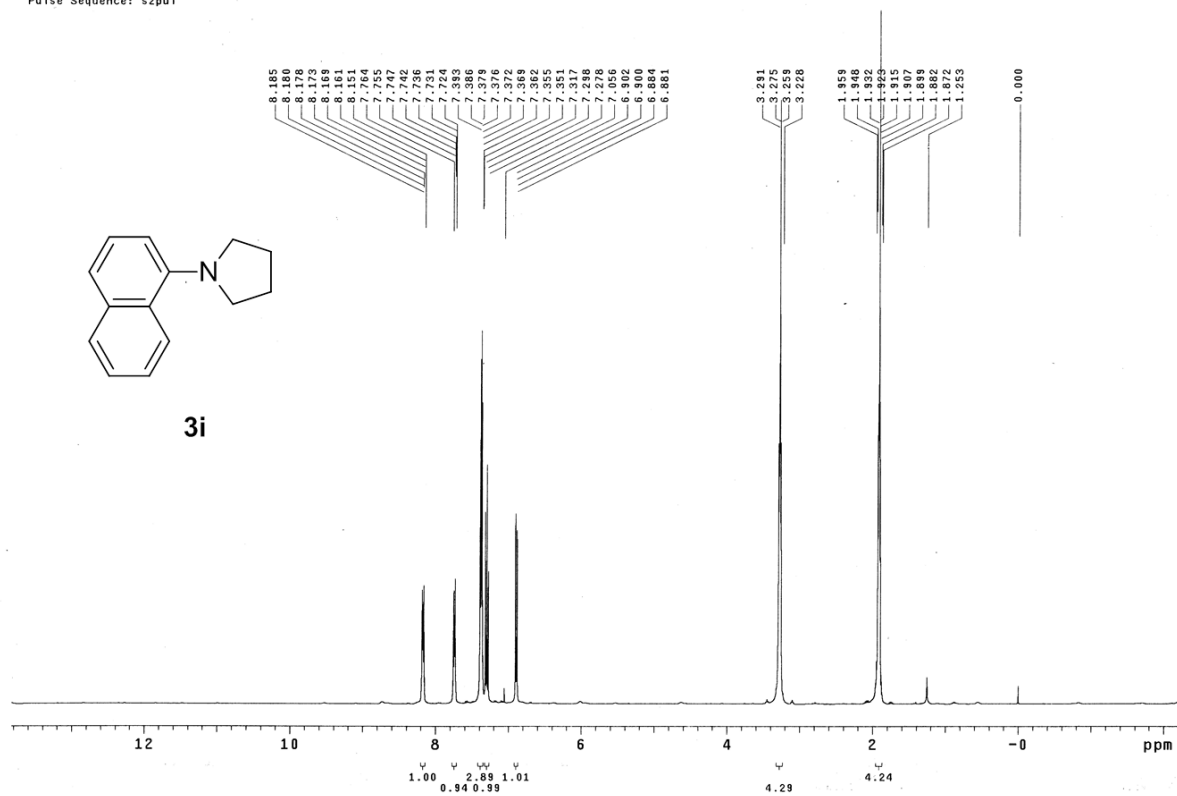

blk-002-031  
File: BLK-002-031-cnmr-120702  
Pulse Sequence: s2pu1

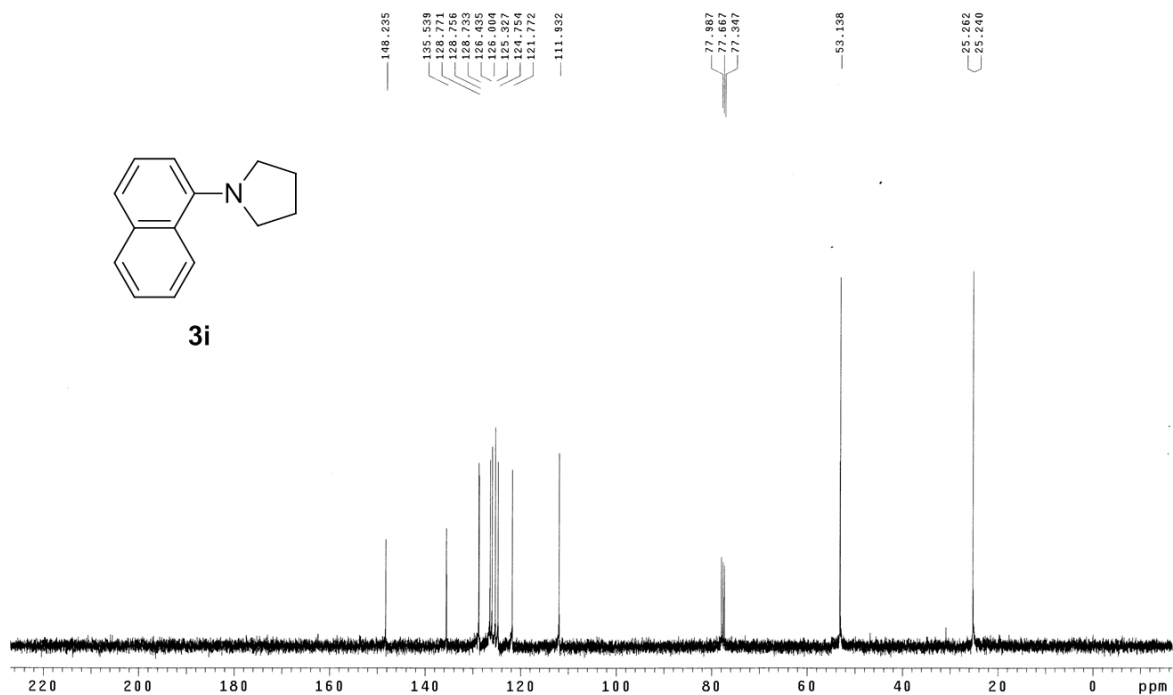

SpinWorks 3: BLK-002-028A

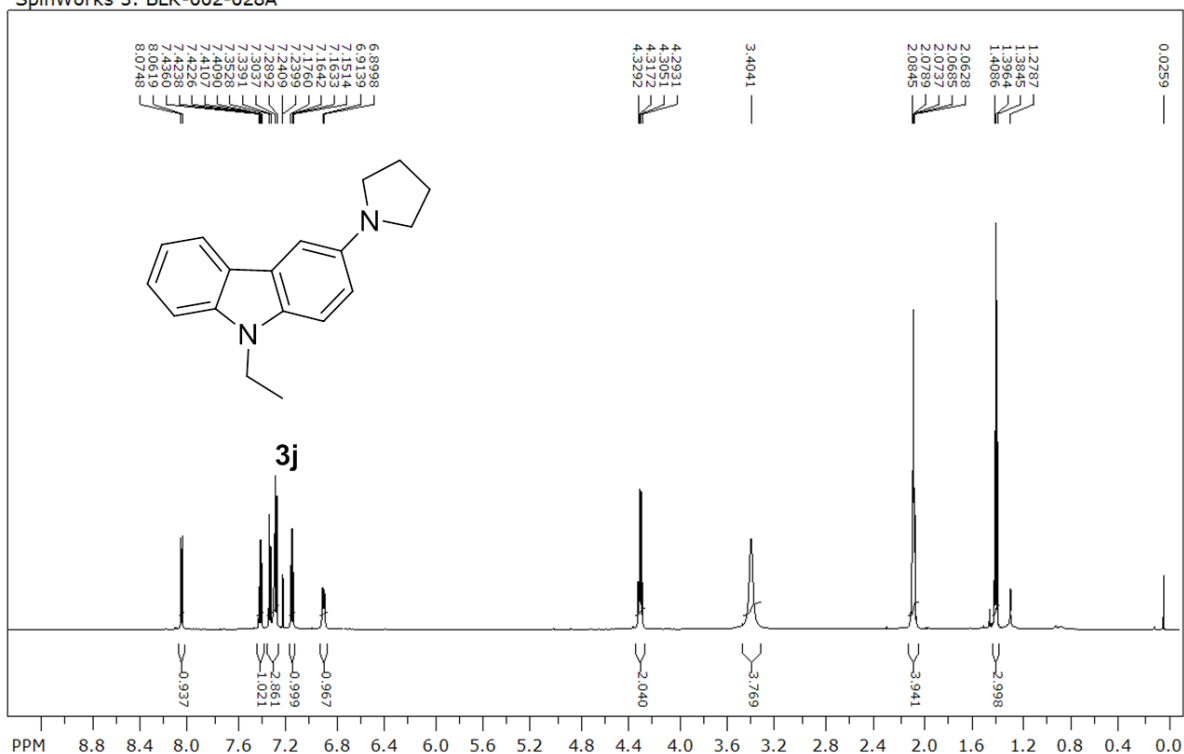

file: ...\\NMR\12sep21\2blk-002-028a.fid\fid block# 1 expt: "s2pul"  
 transmitter freq.: 599.859519 MHz  
 time domain size: 32768 points  
 width: 9615.38 Hz = 16.0294 ppm = 0.293438 Hz/pt  
 number of scans: 4

freq. of 0 ppm: 599.855932 MHz  
 processed size: 32768 complex points  
 LB: 0.000 GF: 0.0000  
 Hz/cm: 230.134 ppm/cm: 0.38365

SpinWorks 3: BLK-002-028A

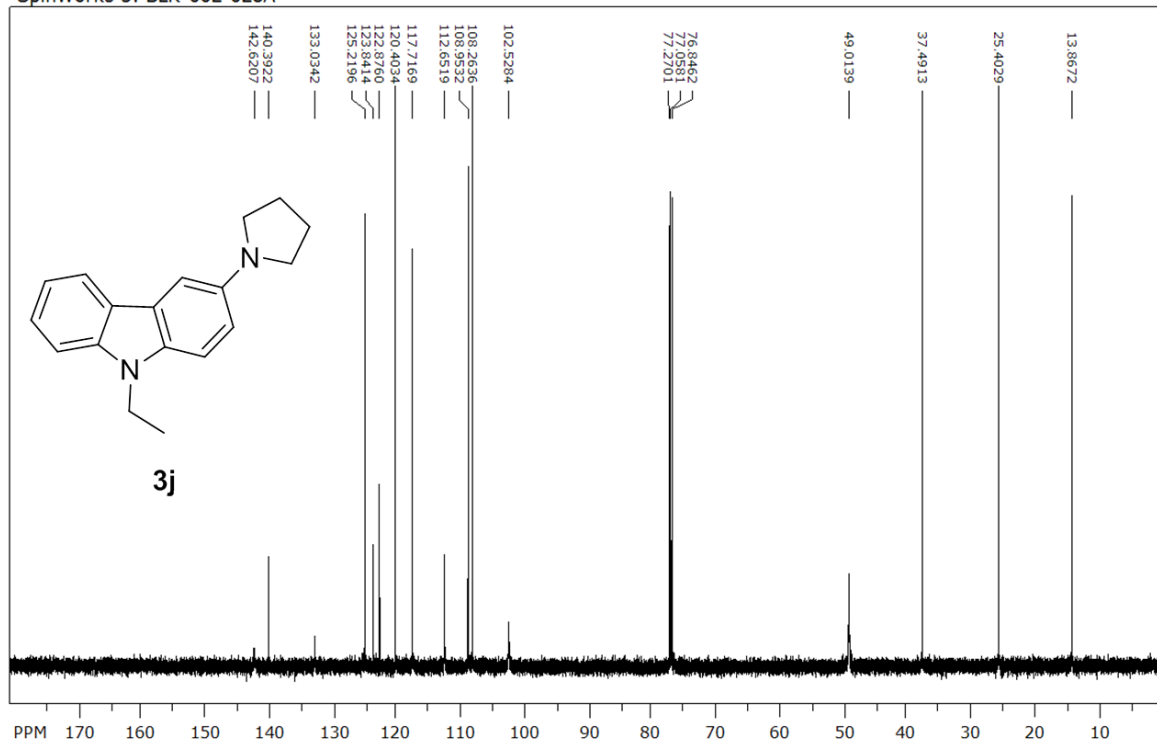

file: ...\\12sep21\2blk-002-028a\_13C.fid\fid block# 1 expt: "s2pul"  
 transmitter freq.: 150.850483 MHz  
 time domain size: 65536 points  
 width: 37878.79 Hz = 251.1015 ppm = 0.577984 Hz/pt  
 number of scans: 288

freq. of 0 ppm: 150.833891 MHz  
 processed size: 65536 complex points  
 LB: 0.000 GF: 0.0000  
 Hz/cm: 1096.920 ppm/cm: 7.27157

b1k-002-053a  
File: BLK-002-053a-hnmr-120905  
Pulse Sequence: s2pu1

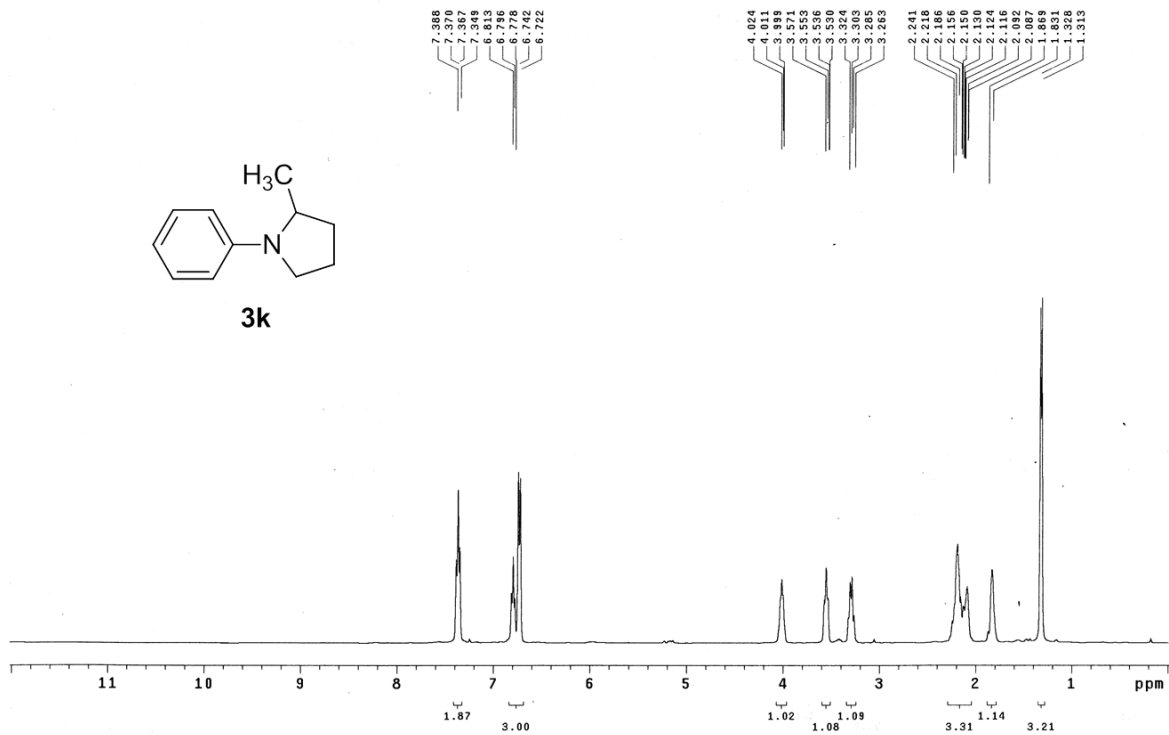

b1k-002-053a  
File: BLK-002-053a-cnmr-120905  
Pulse Sequence: s2pu1

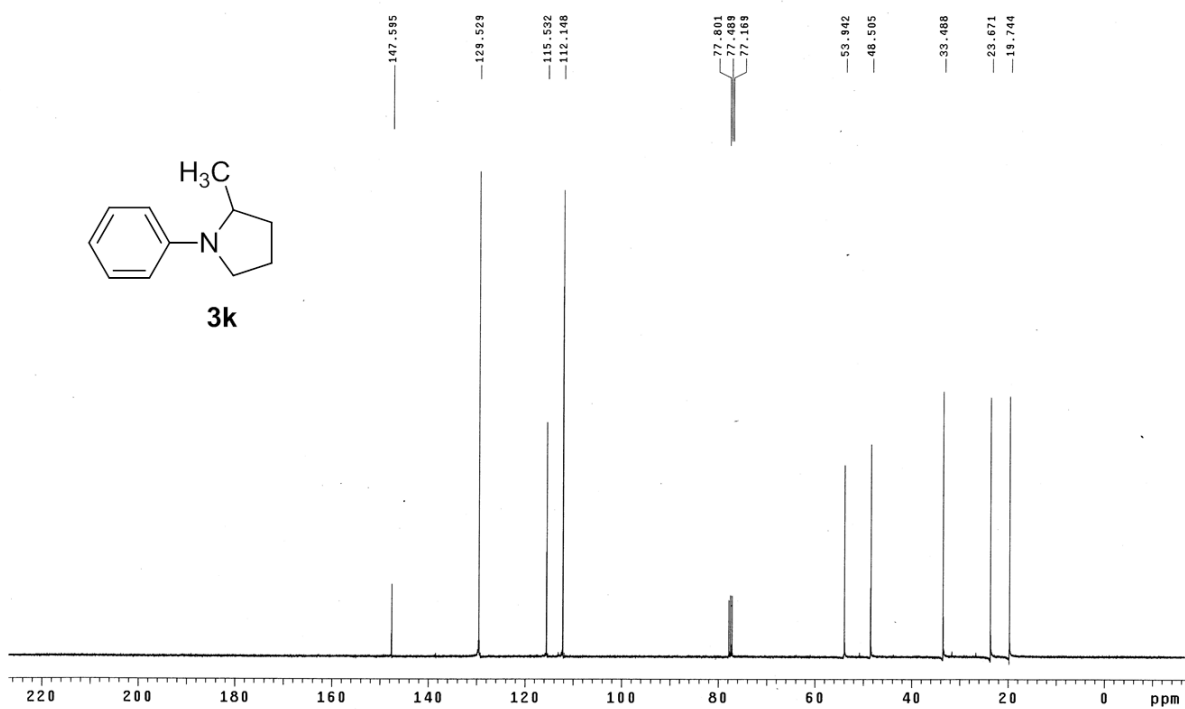

blk-002-055

File: BLK-002-055-hrnr-120910

Pulse Sequence: s2pu1

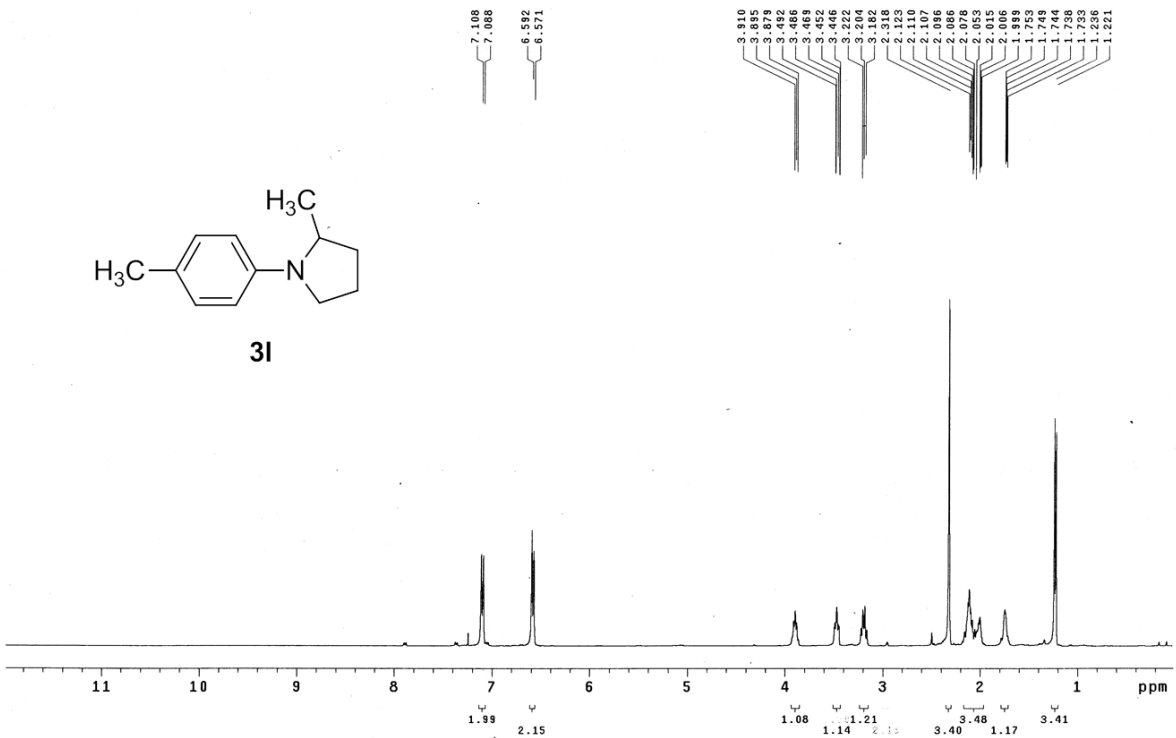

blk-002-055

File: BLK-002-055-cnmr-120910

Pulse Sequence: s2pu1

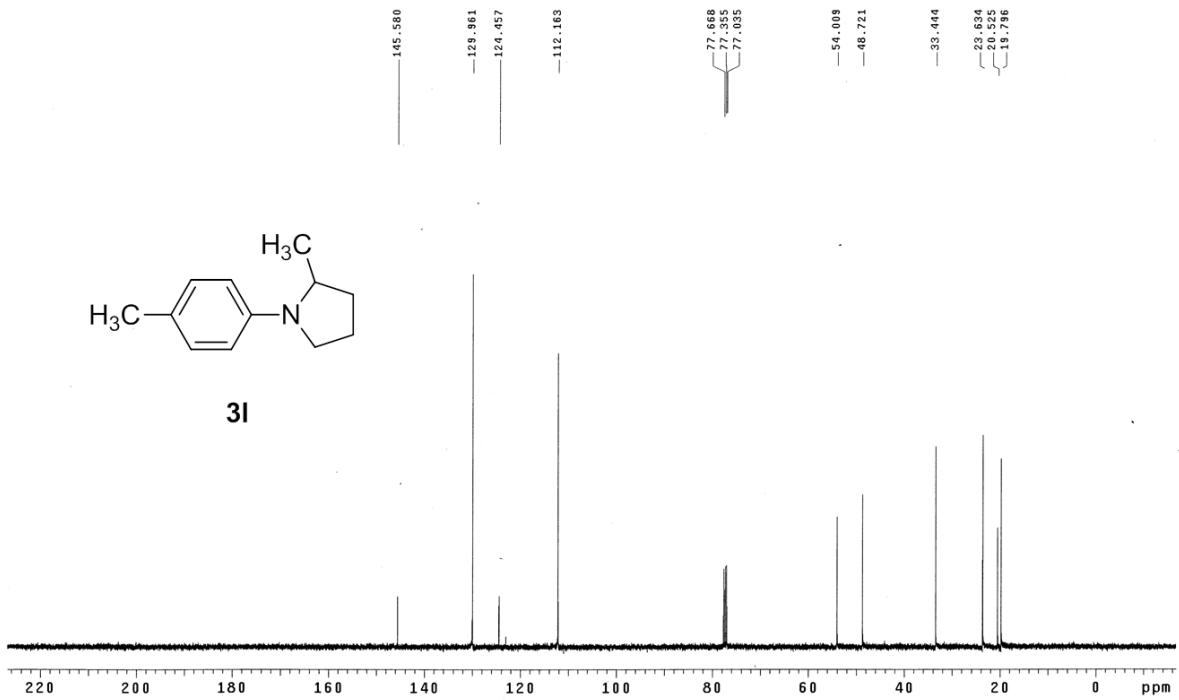

blk-002-056

File: BLK-002-056-hnmr-120910

Pulse Sequence: s2pu1

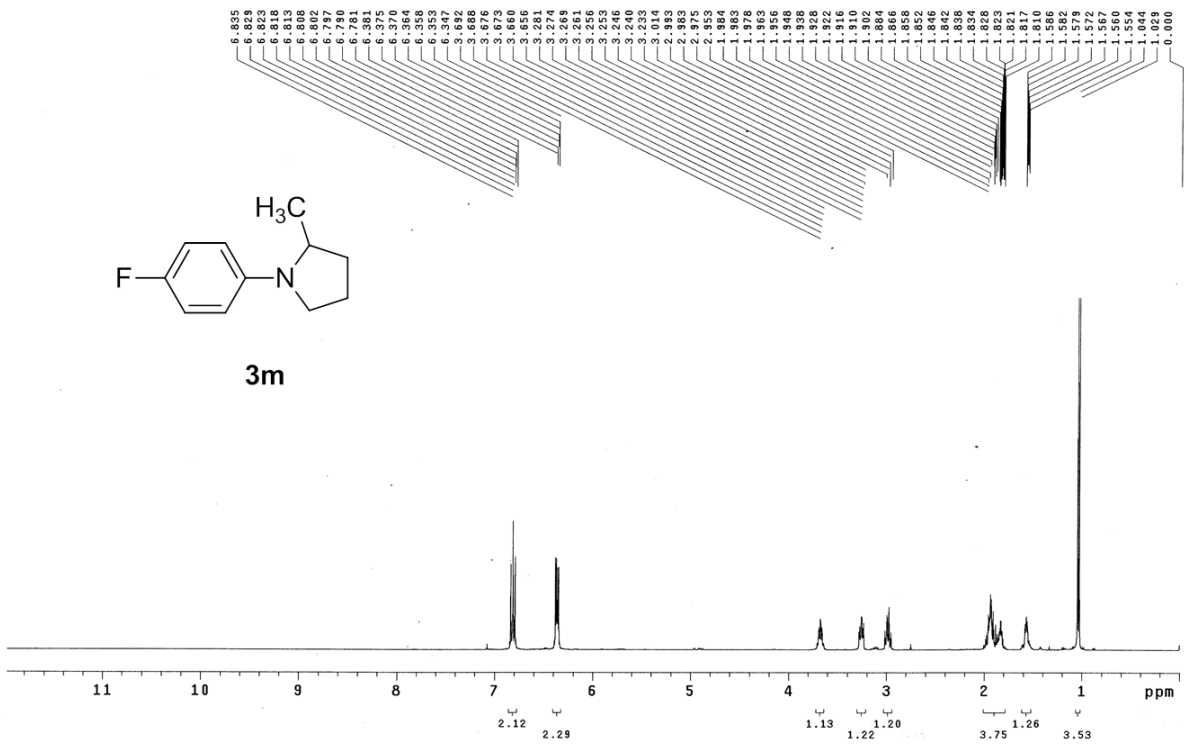

blk-002-056

File: BLK-002-056-cnmr-120910

Pulse Sequence: s2pu1

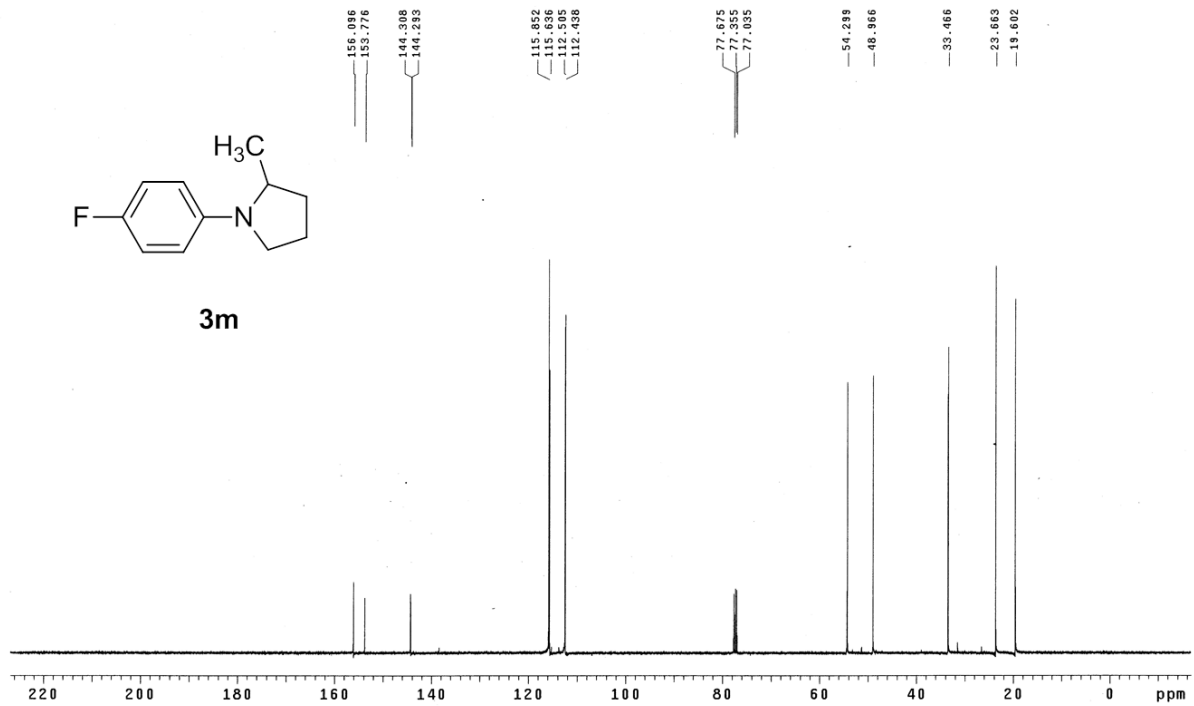



blk-002-030

File: BLK-002-030-hnmr-120629

Pulse Sequence: s2pu1

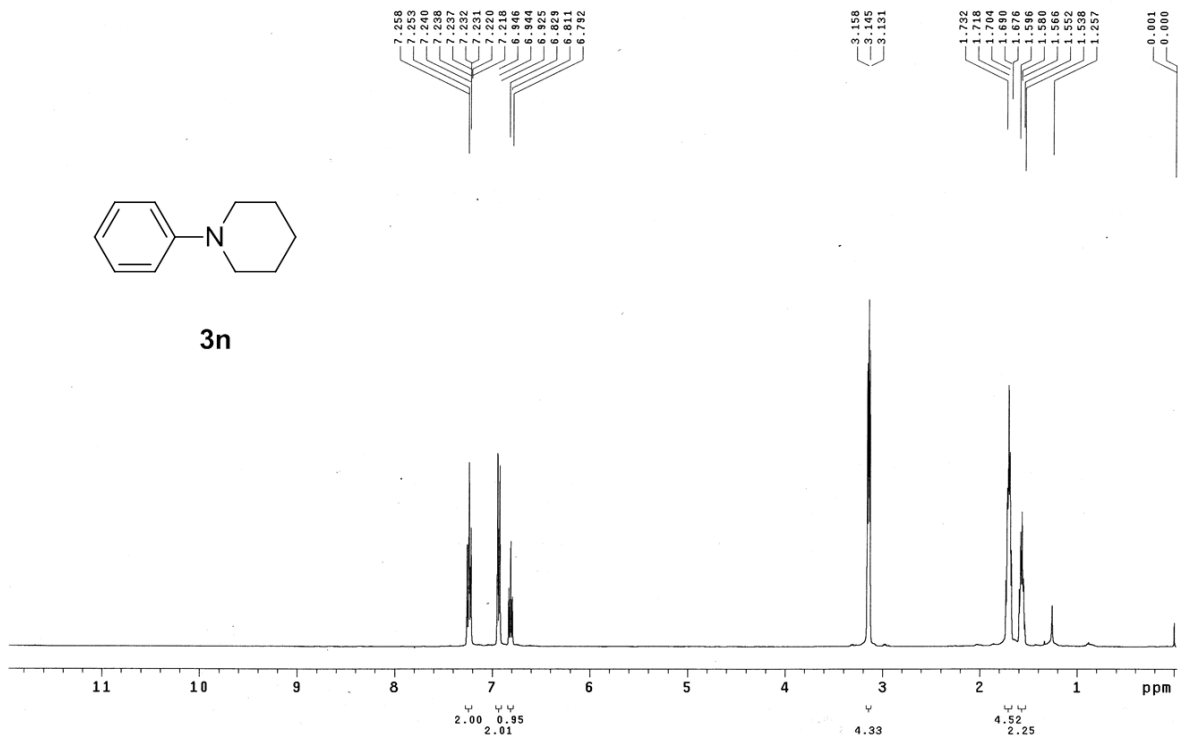

blk-002-030

File: Carbon

Pulse Sequence: s2pu1

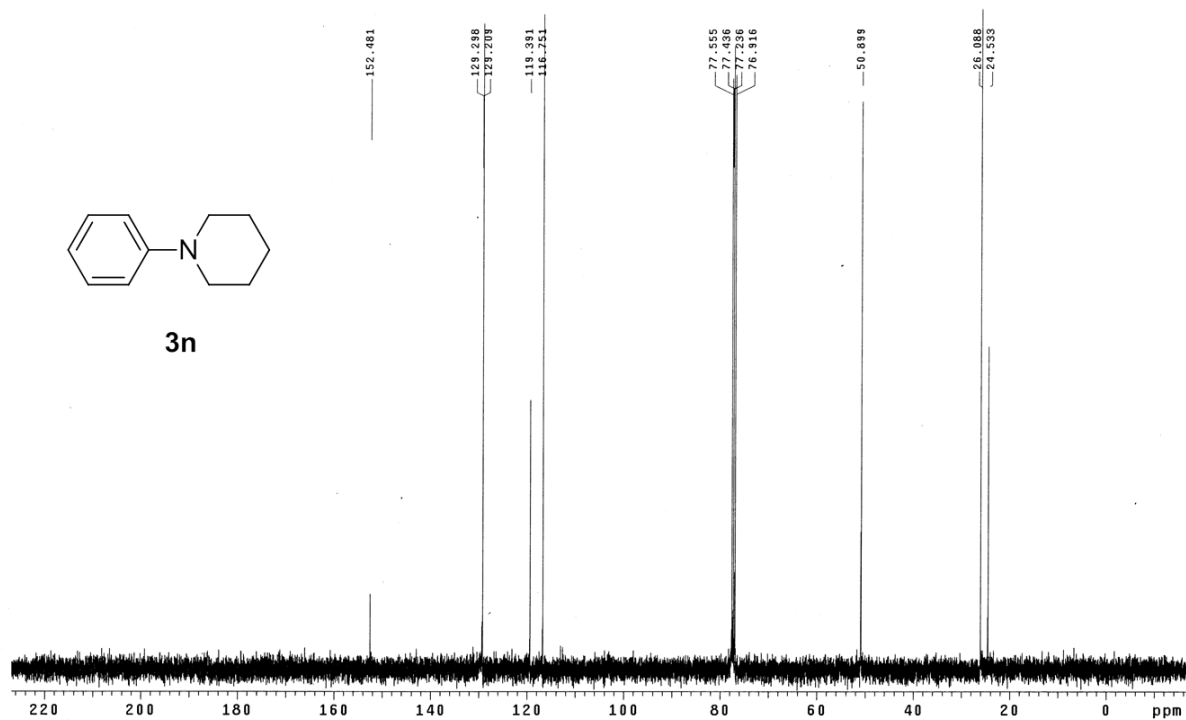

blk-002-035

File: BLK-002-035-hnmr-120713

Pulse Sequence: s2pu1

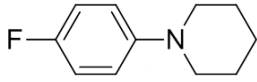

3o

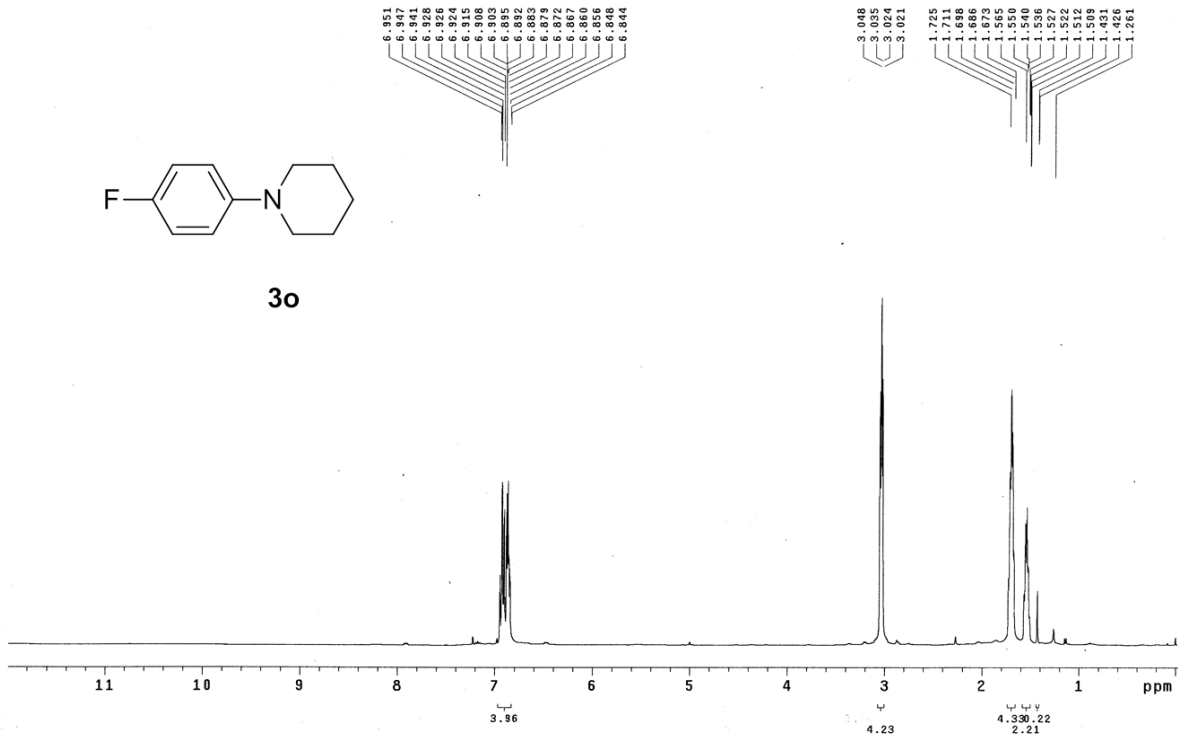

blk-002-035

File: BLK-002-035-cnmr-120713

Pulse Sequence: s2pu1

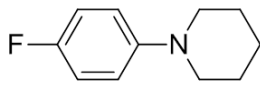

3o

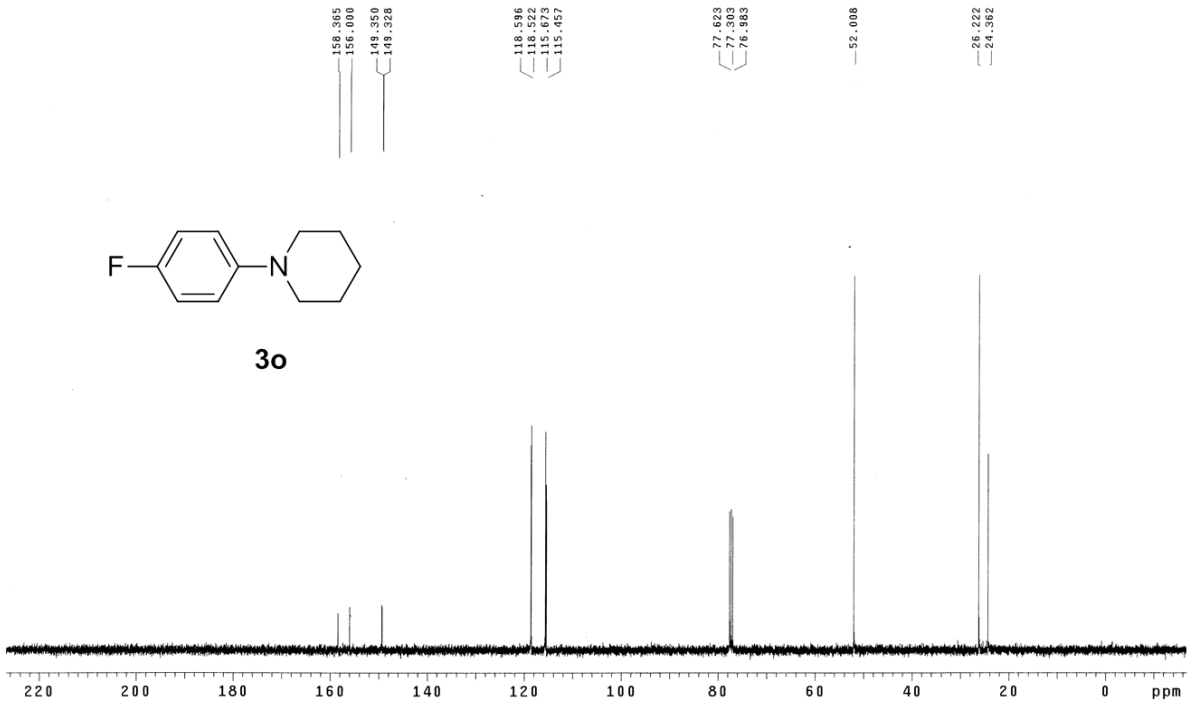

blk-002-058

File: Proton

Pulse Sequence: s2pu1

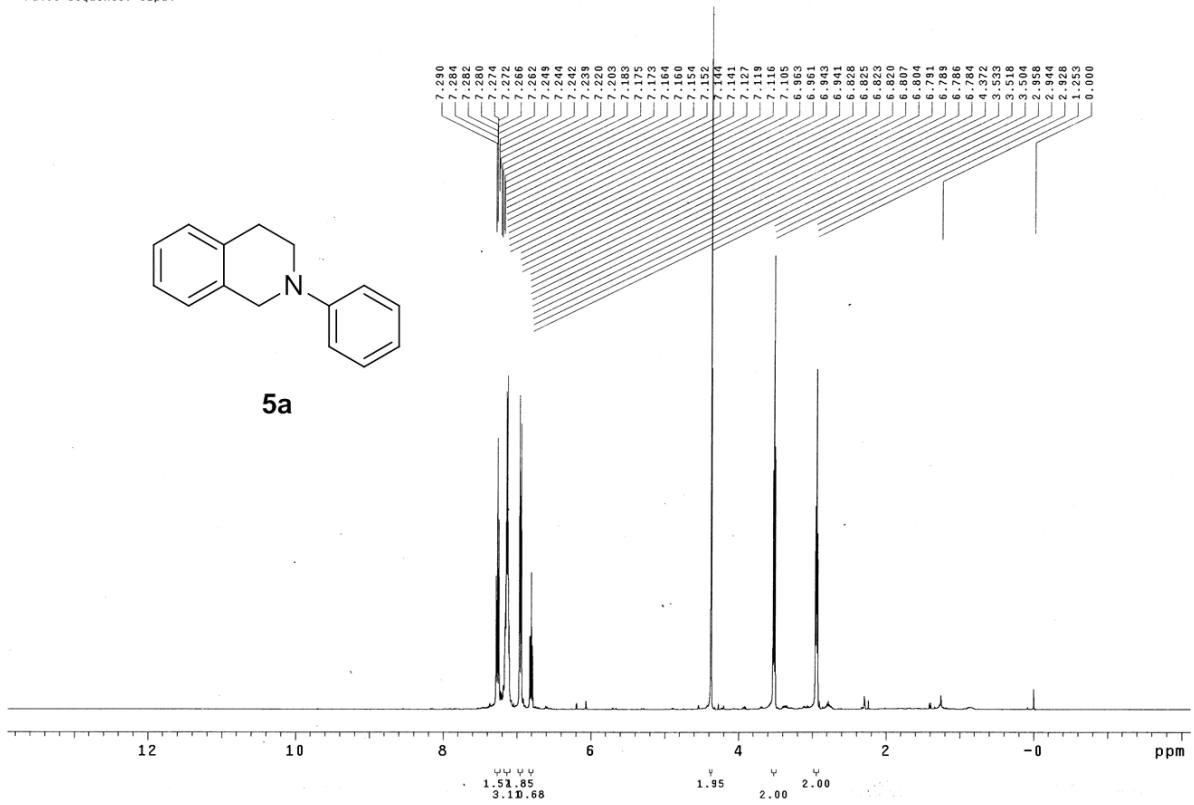

blk-002-058

File: Carbon

Pulse Sequence: s2pu1

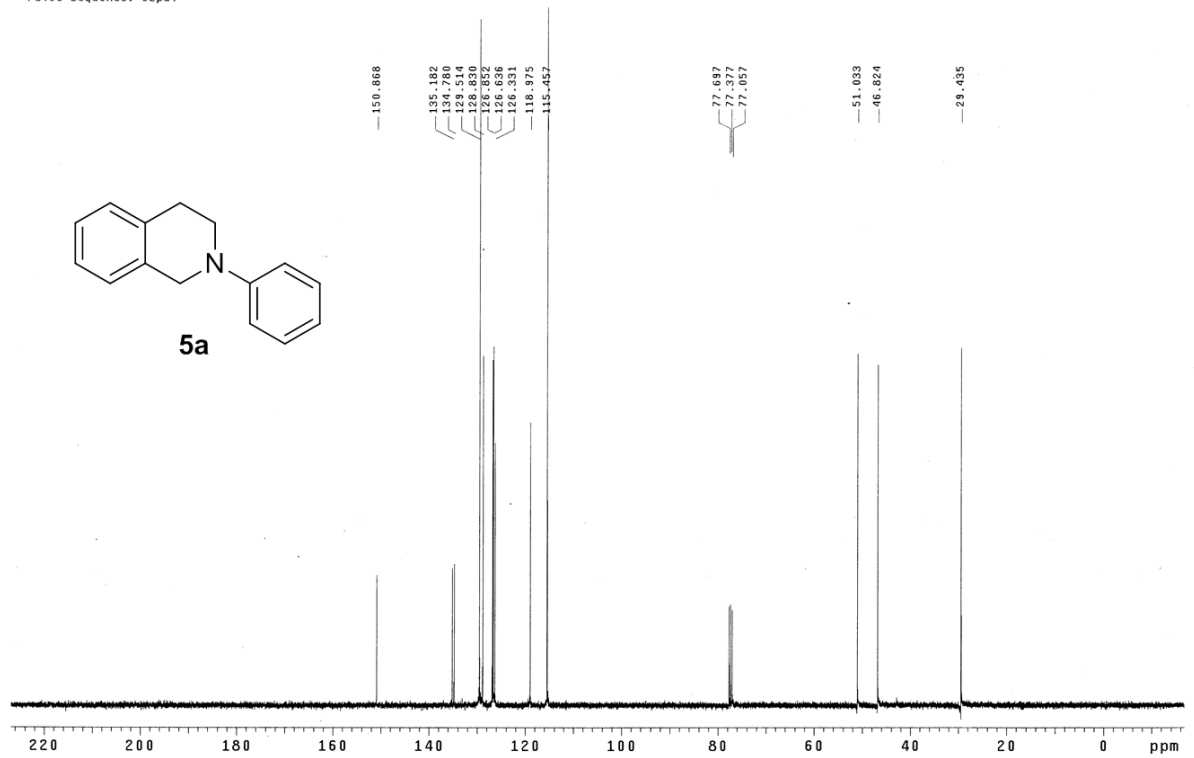

blk-002-057  
File: BLK-002-057-hnmr-120912  
Pulse Sequence: s2pu1

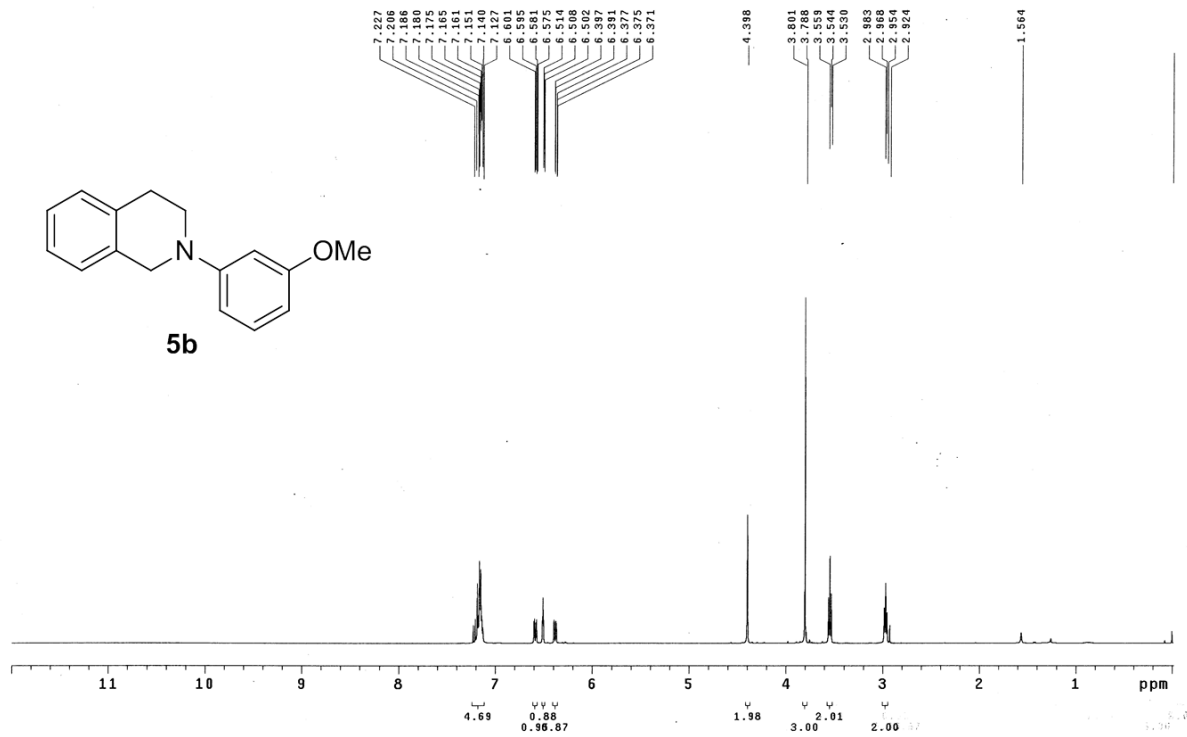

blk-002-057  
File: BLK-002-057-cnmr-120912  
Pulse Sequence: s2pu1

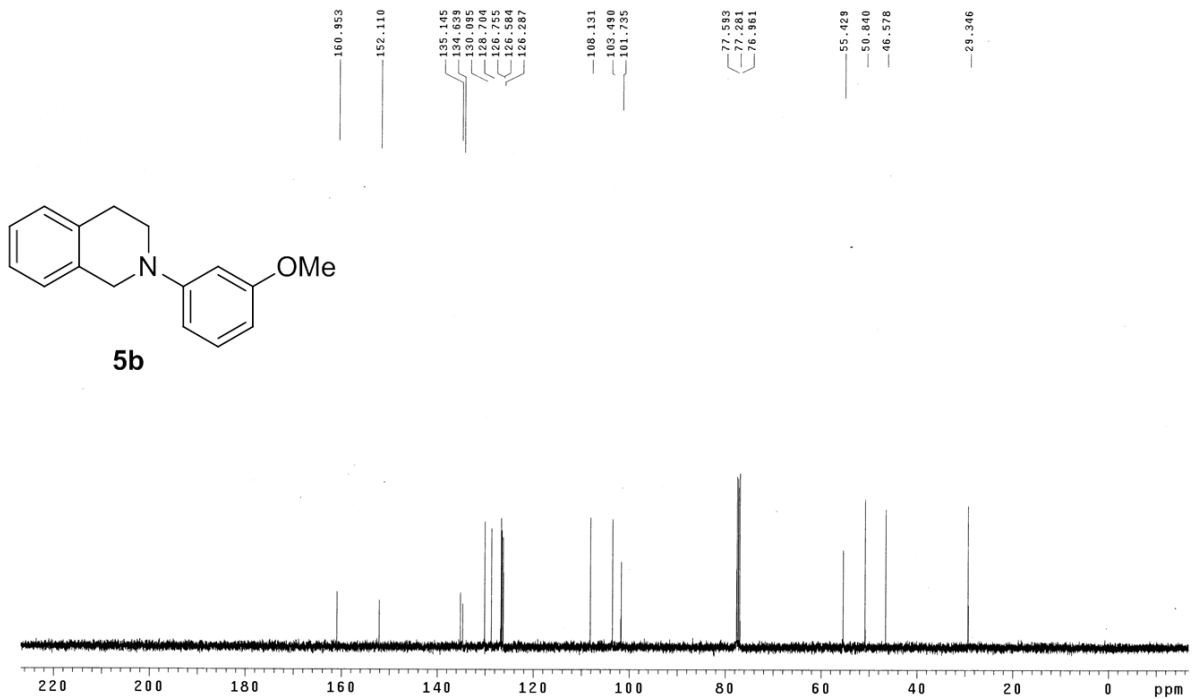

blk-002-040

File: BLK-002-040-hnmr-120725

Pulse Sequence: s2pu1

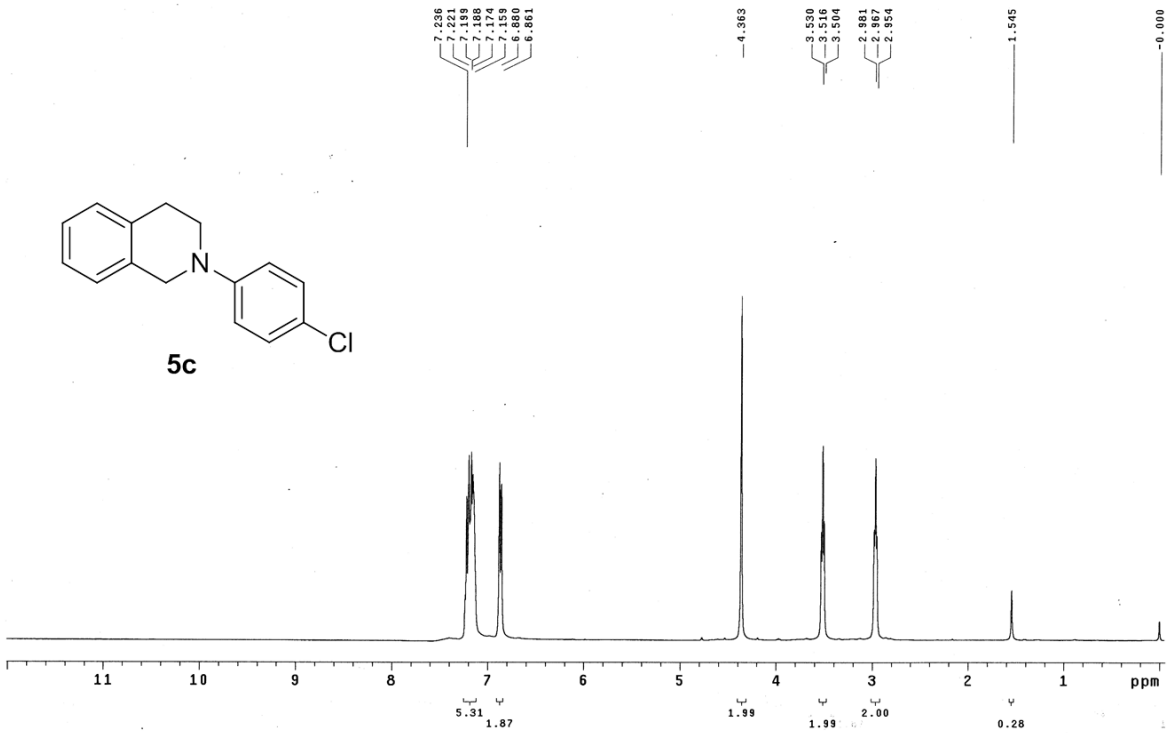

blk-002-040

File: BLK-002-040-cnmr-120725

Pulse Sequence: s2pu1

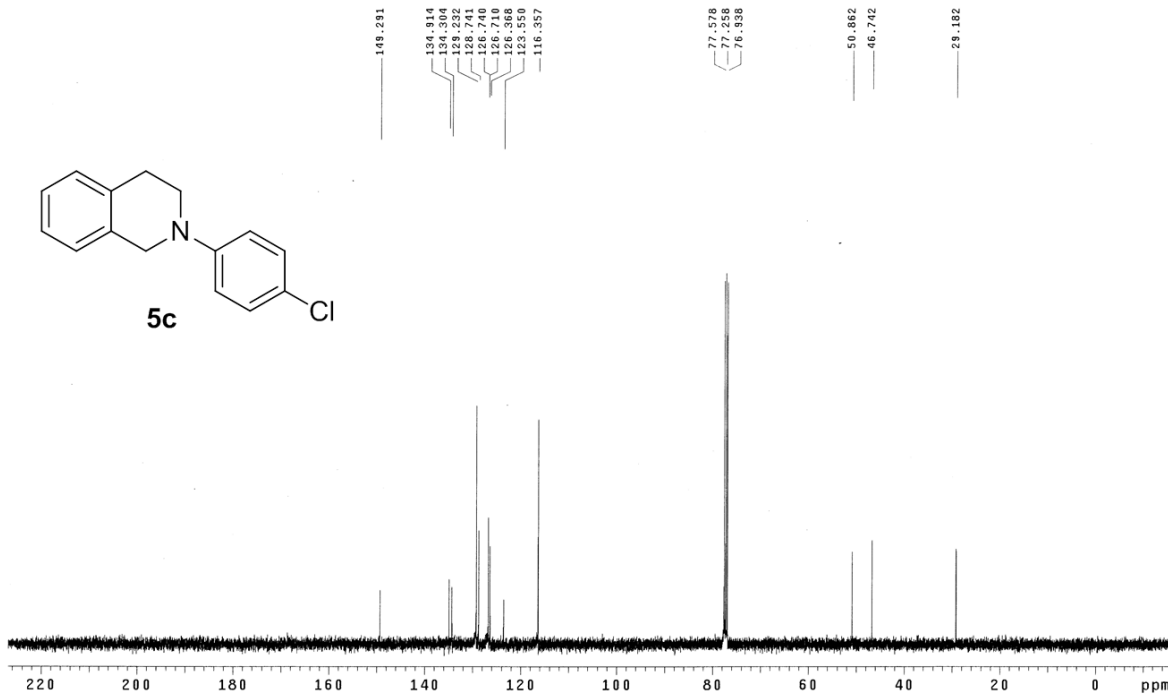

blk-002-037a

File: BLK-002-037a-hnmr-120723

Pulse Sequence: s2pu1

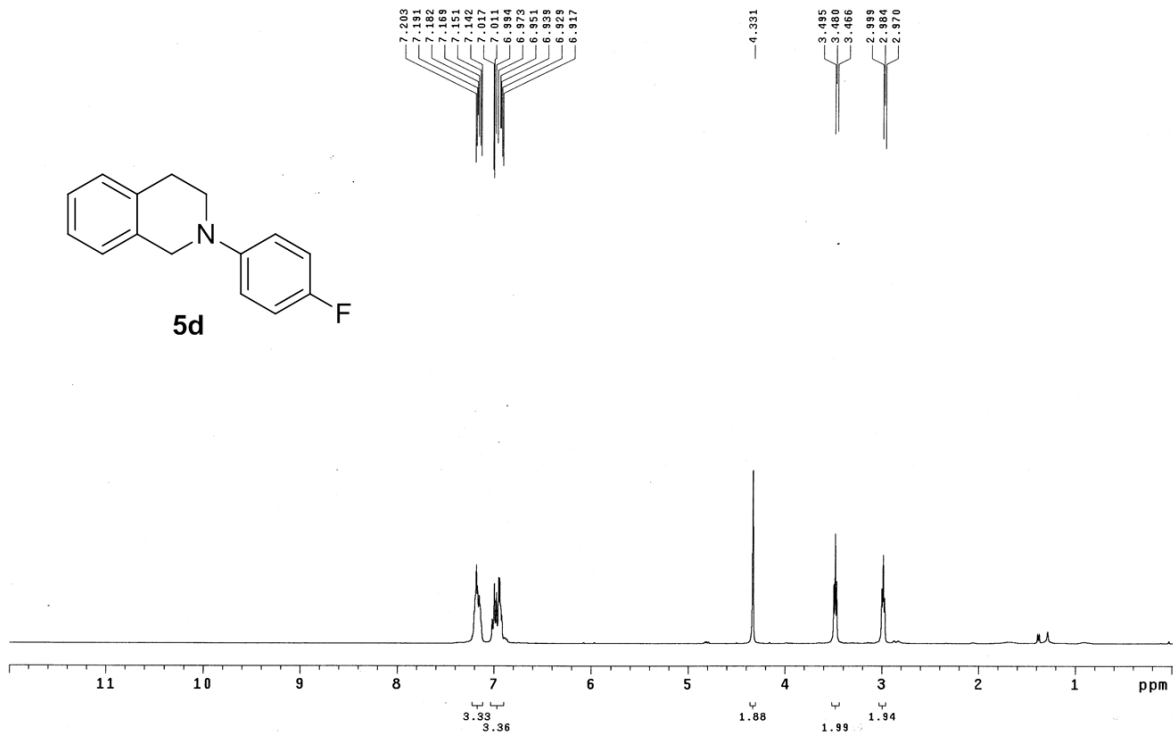

blk-002-037a

File: BLK-002-037a-cnmr-120723

Pulse Sequence: s2pu1

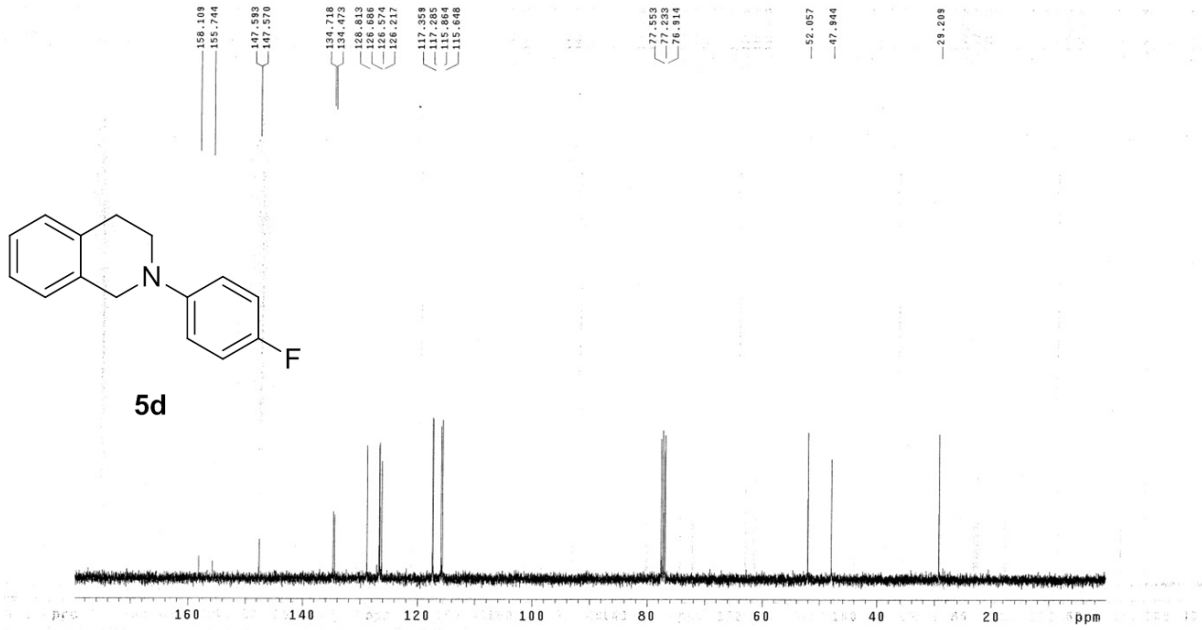

BLK-002-052A

Sample Name:

Data Collected on:  
Agilent-NMR-vnmrs600  
Archive directory:

Sample directory:

Fidfile: PROTON

Pulse Sequence: PROTON (s2pul)  
Solvent: cdcl3  
Data collected on: Sep 21 2012

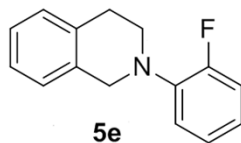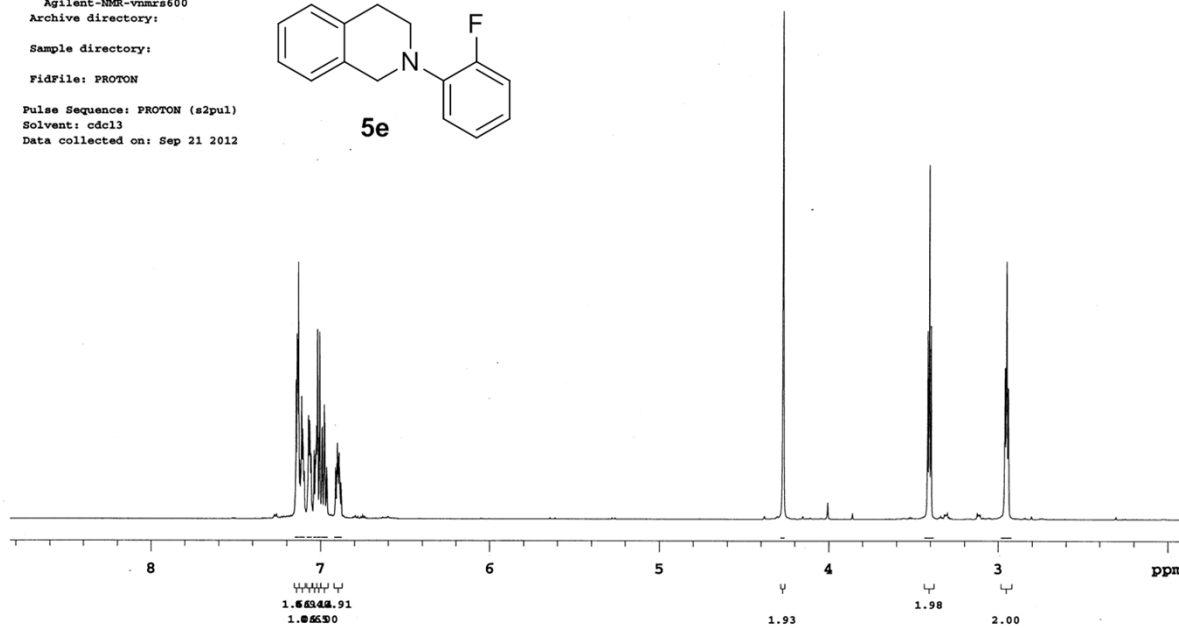

BLK-002-052A

Sample Name:

Data Collected on:  
Agilent-NMR-vnmrs600  
Archive directory:

Sample directory:

Fidfile: CARBON

Pulse Sequence: CARBON (s2pul)  
Solvent: cdcl3  
Data collected on: Sep 21 2012

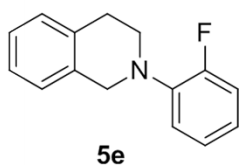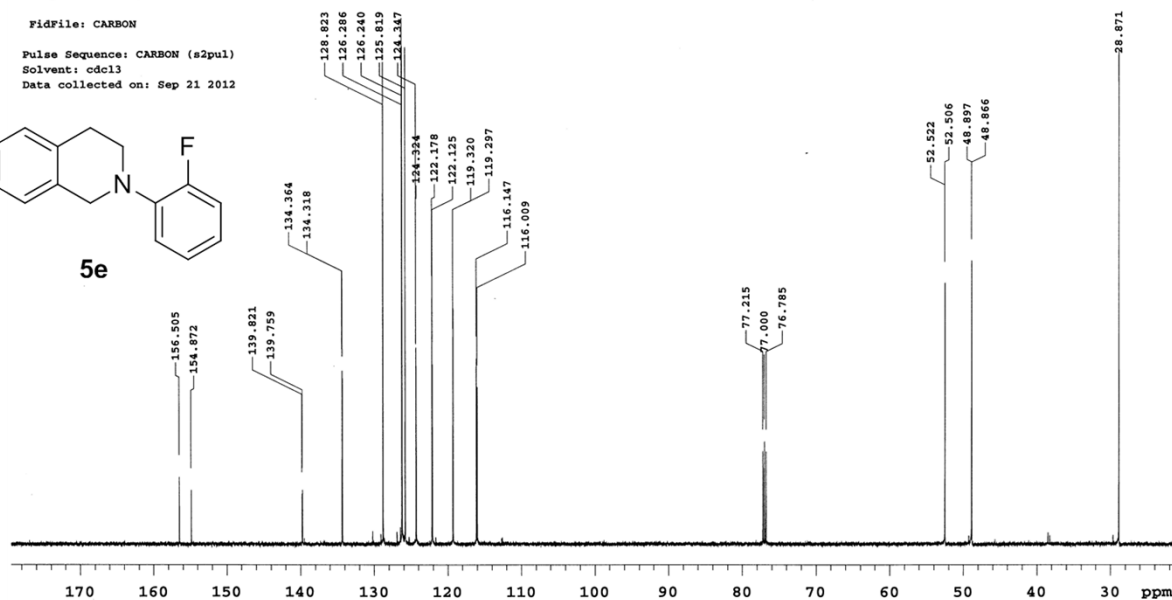

## SpinWorks 3: BLK-002-050A

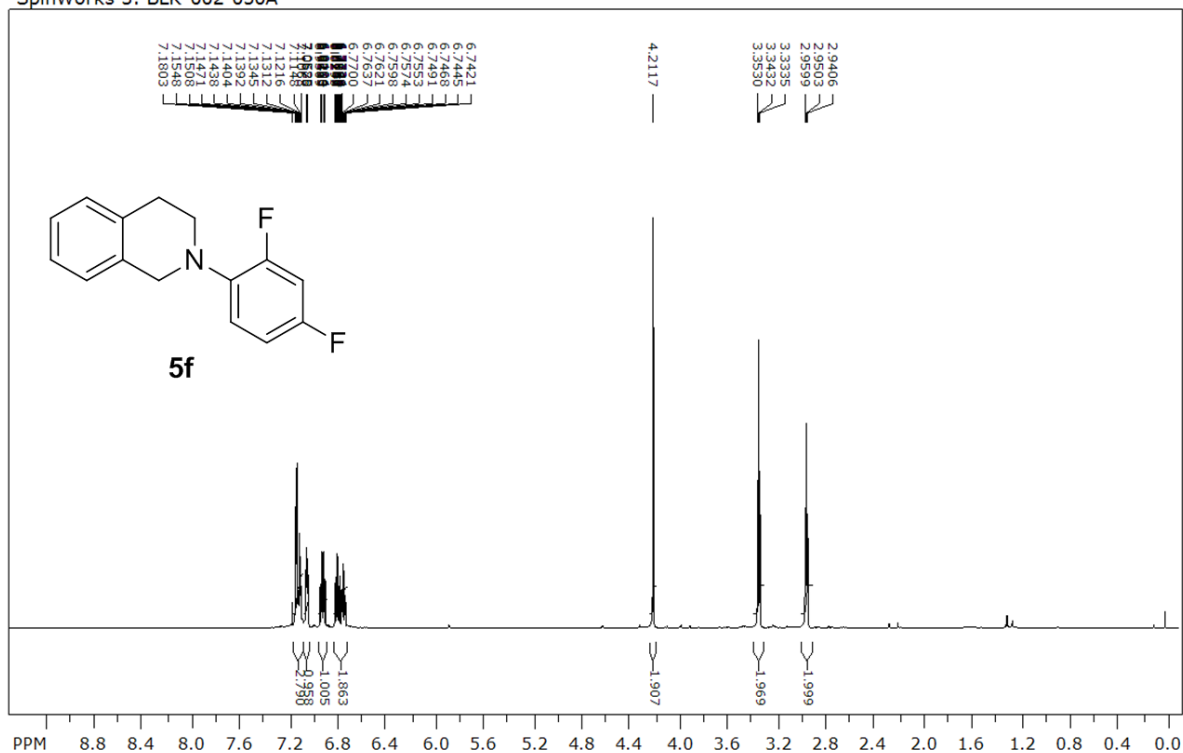

file: ...NMR\12sep21\4blk-002-050a.fid\fid block# 1 expt: "s2pul"  
 transmitter freq.: 599.859519 MHz  
 time domain size: 32768 points  
 width: 9615.38 Hz = 16.0294 ppm = 0.293438 Hz/pt  
 number of scans: 4

freq. of 0 ppm: 599.855968 MHz  
 processed size: 32768 complex points  
 LB: 0.000 GF: 0.0000  
 Hz/cm: 230.769 ppm/cm: 0.38471

## SpinWorks 3: 5.BLK-002-050A

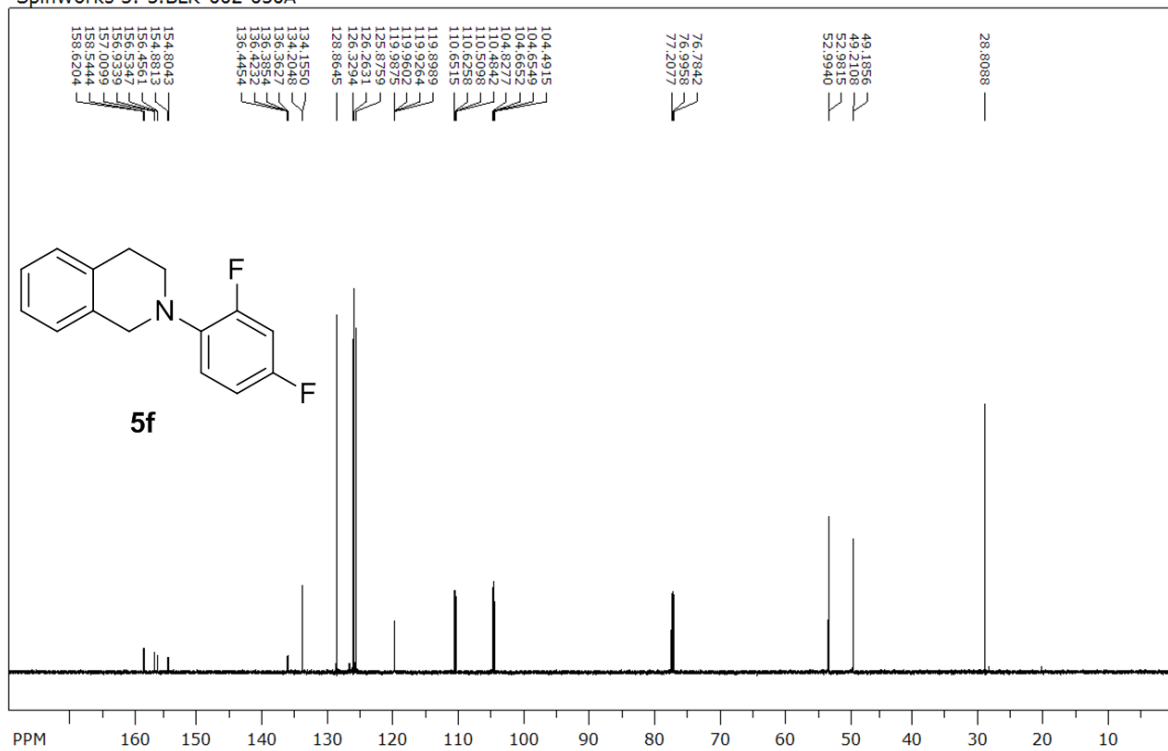

file: ...12sep21\4blk-002-050a\_13C.fid\fid block# 1 expt: "s2pul"  
 transmitter freq.: 150.850483 MHz  
 time domain size: 65536 points  
 width: 37878.79 Hz = 251.1015 ppm = 0.577984 Hz/pt  
 number of scans: 80

freq. of 0 ppm: 150.833908 MHz  
 processed size: 65536 complex points  
 LB: 0.000 GF: 0.0000  
 Hz/cm: 1084.398 ppm/cm: 7.18856



blk-002-051

File: BLK-002-051-hnmr-120821

Pulse Sequence: s2pu1

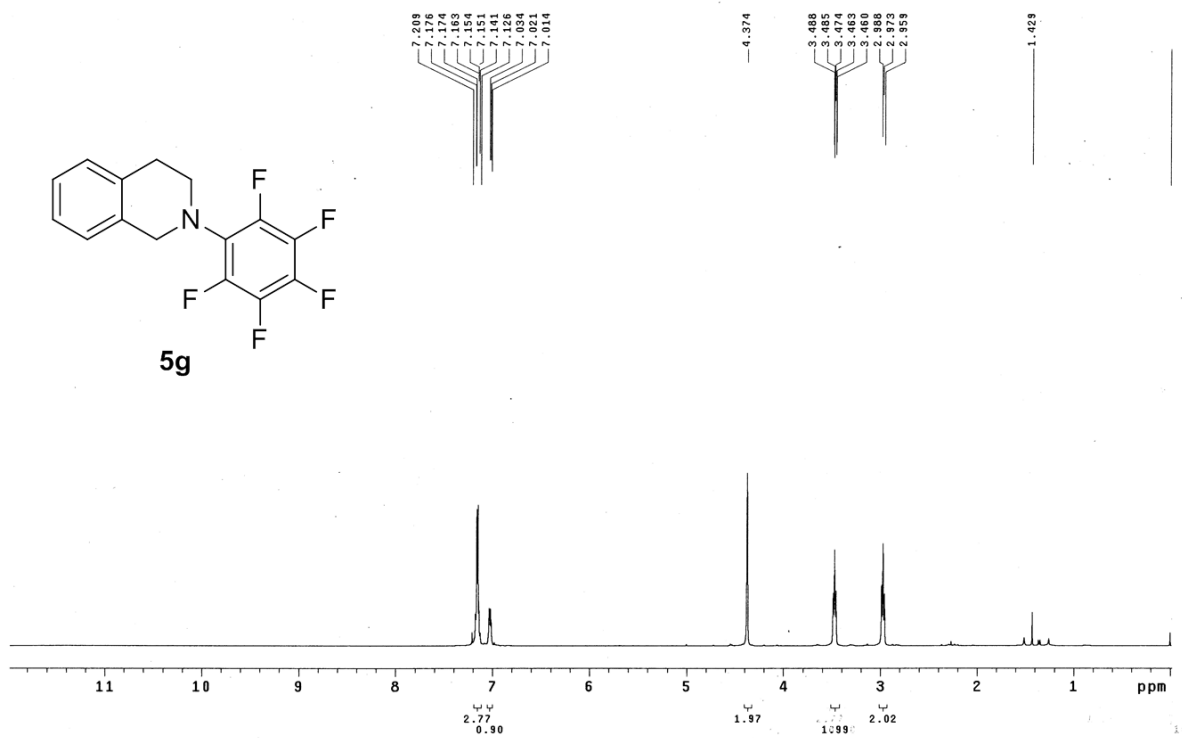

blk-002-051

File: BLK-002-051-cnmr-120821

Pulse Sequence: s2pu1

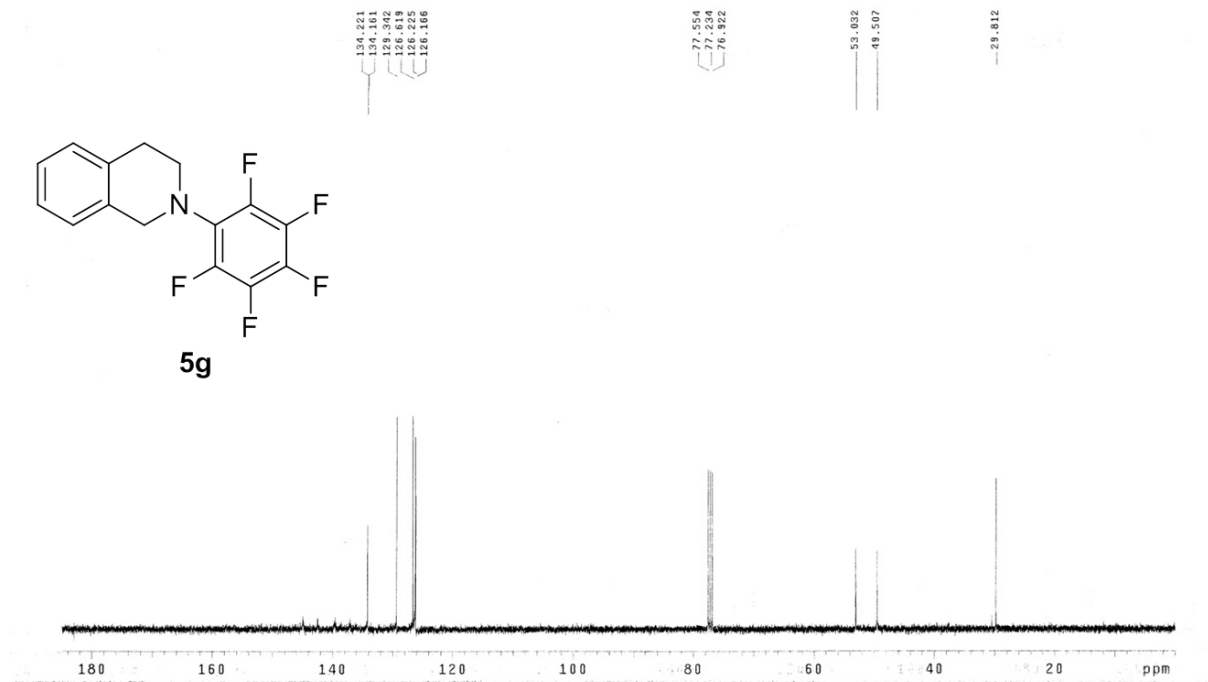

blk-002-049  
File: BLK-002-049-hnmr-120810  
Pulse Sequence: s2pu1

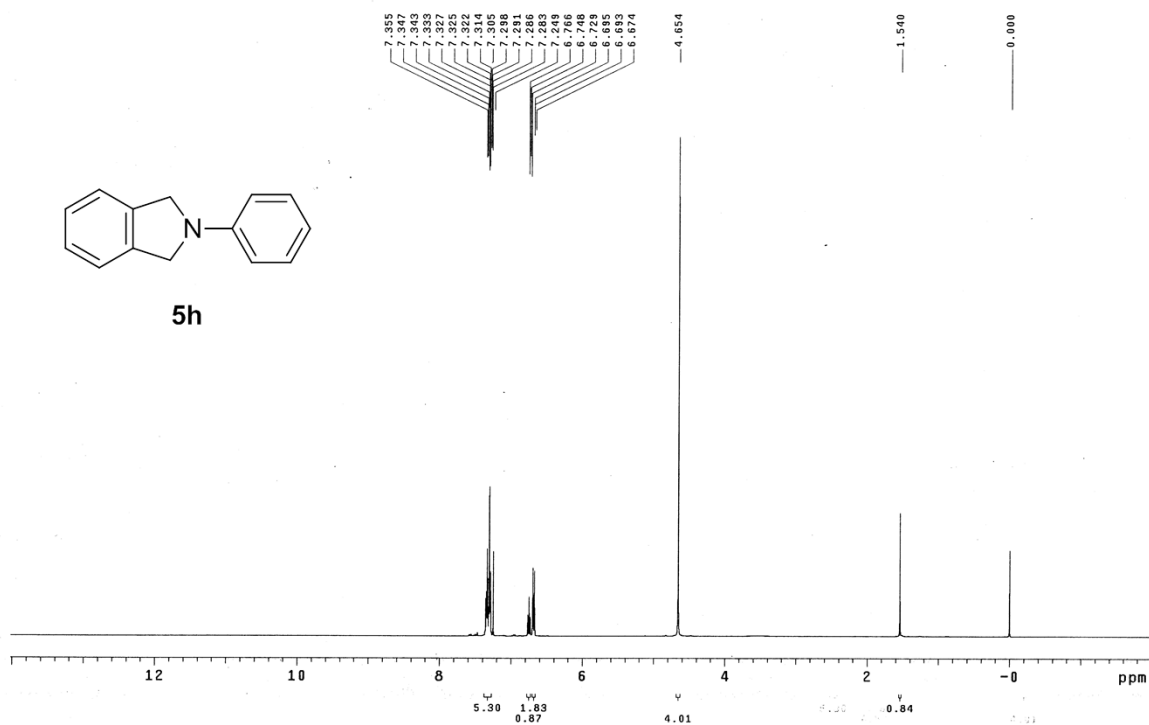

blk-002-049a  
File: BLK-002-049a-cnmr-120813  
Pulse Sequence: s2pu1

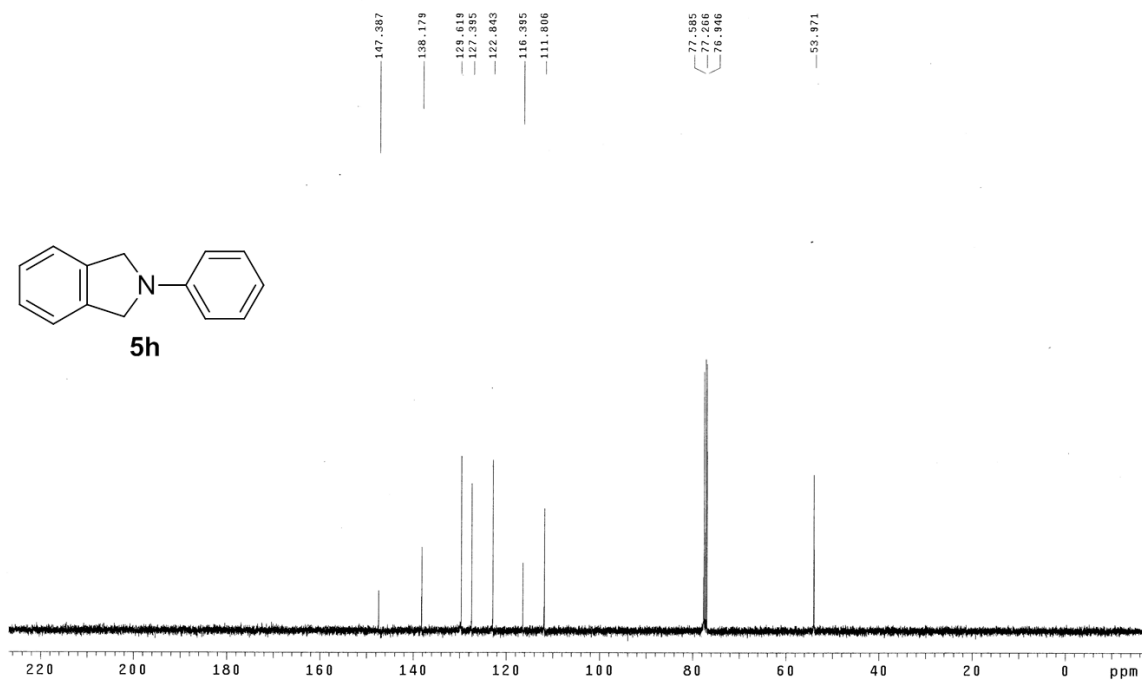

blk-002-045a  
File: Proton  
Pulse Sequence: s2pu1

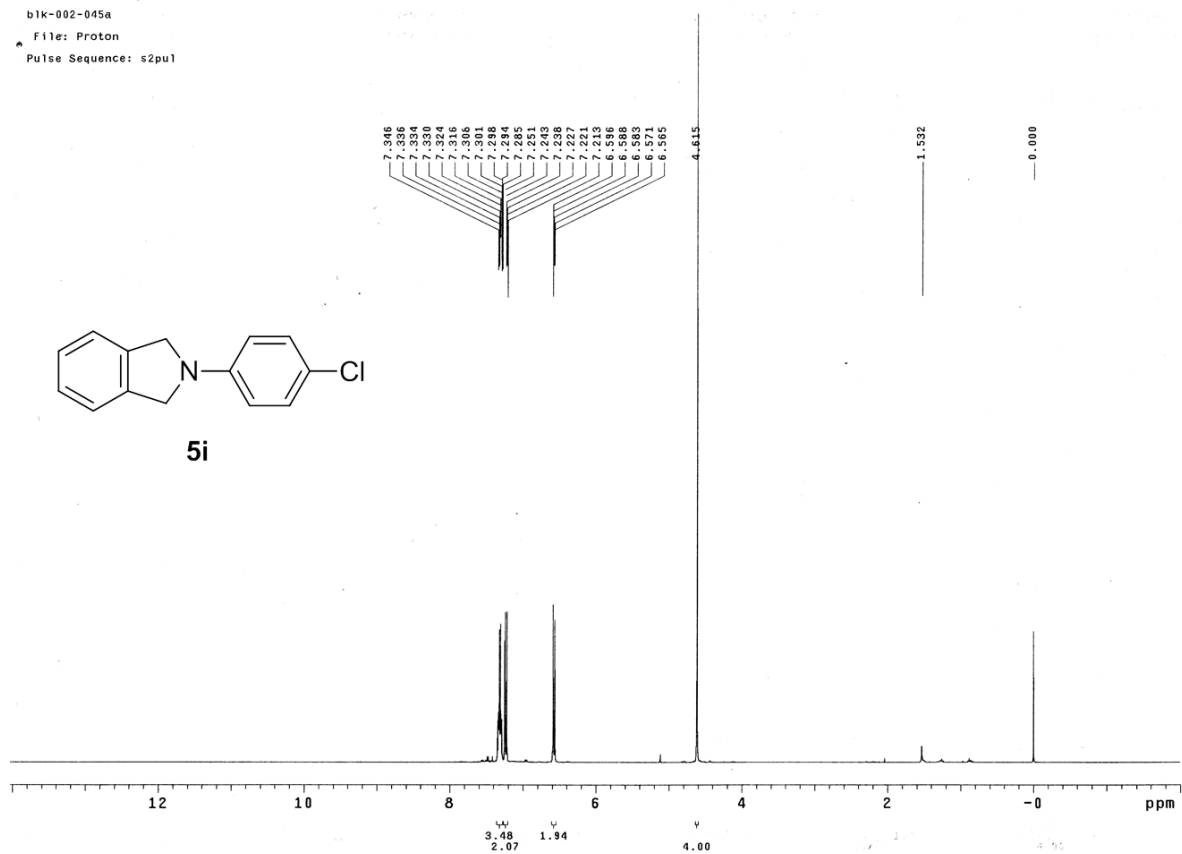

blk-002-045a  
File: Carbon  
Pulse Sequence: s2pu1

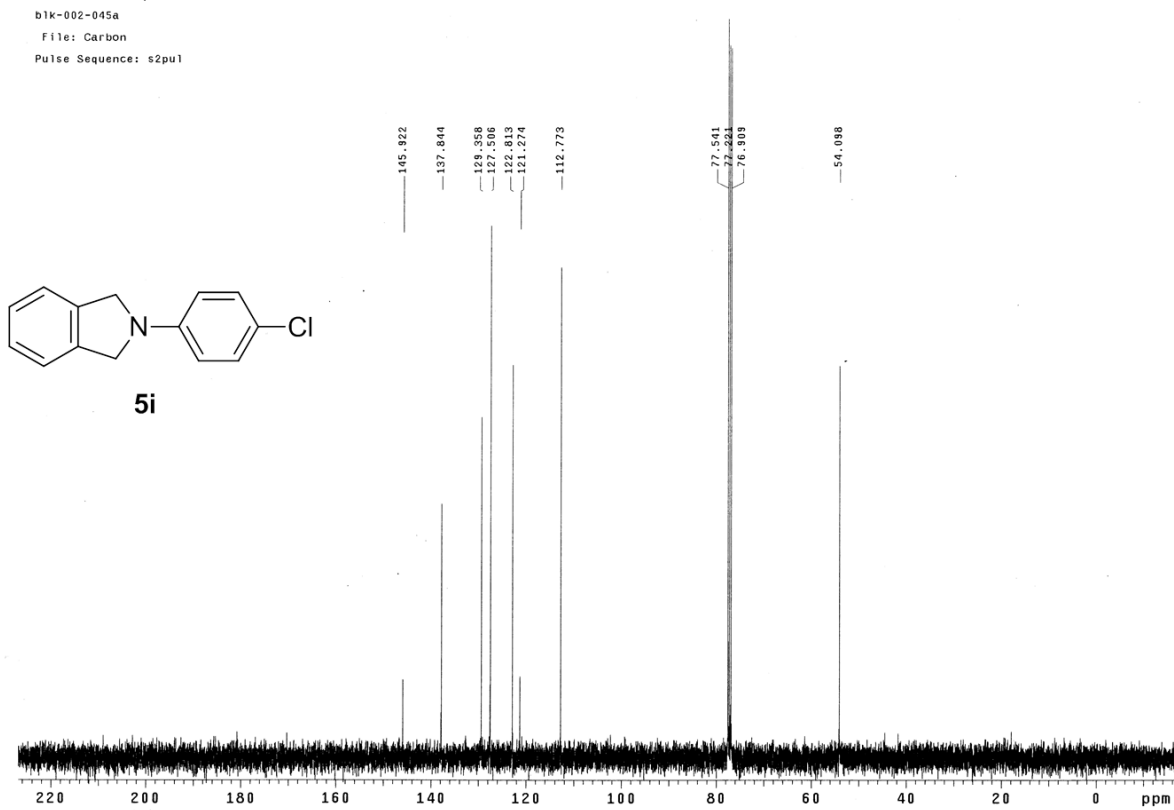

blk-002-039a  
File: BLK-002-039a-hnmr-120806  
Pulse Sequence: s2pu1

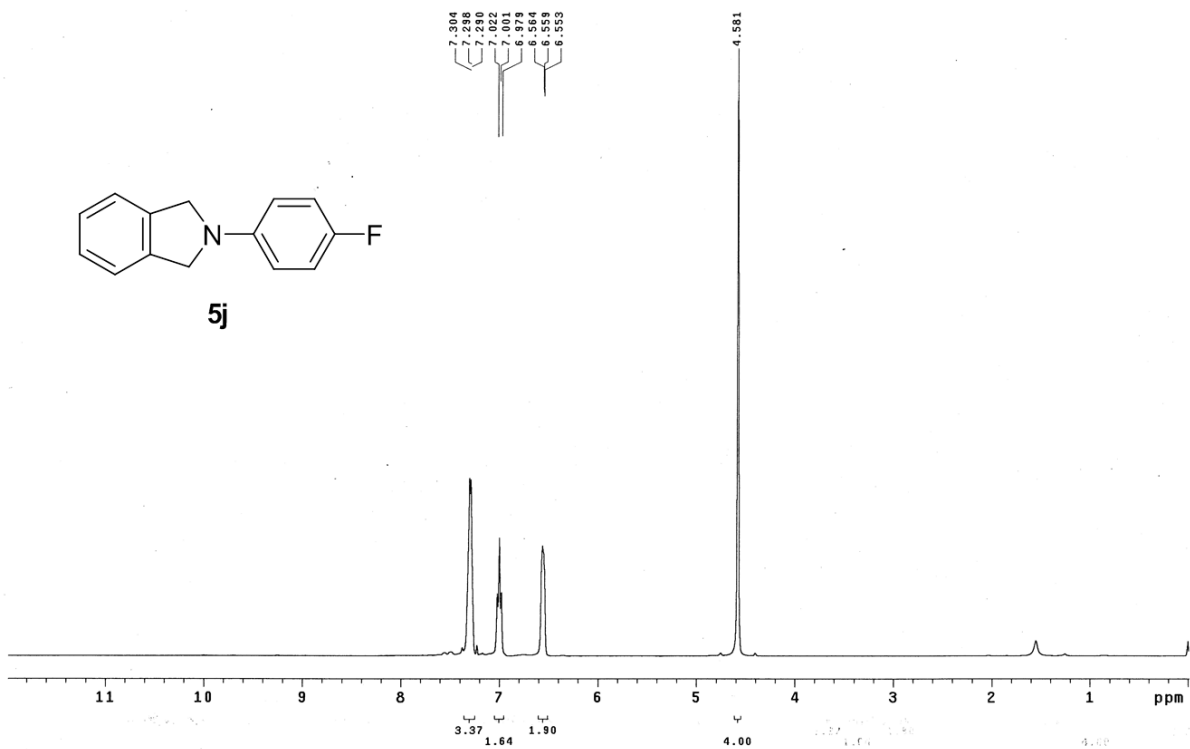

blk-002-039a  
File: BLK-002-039a-cnmr-120806  
Pulse Sequence: s2pu1

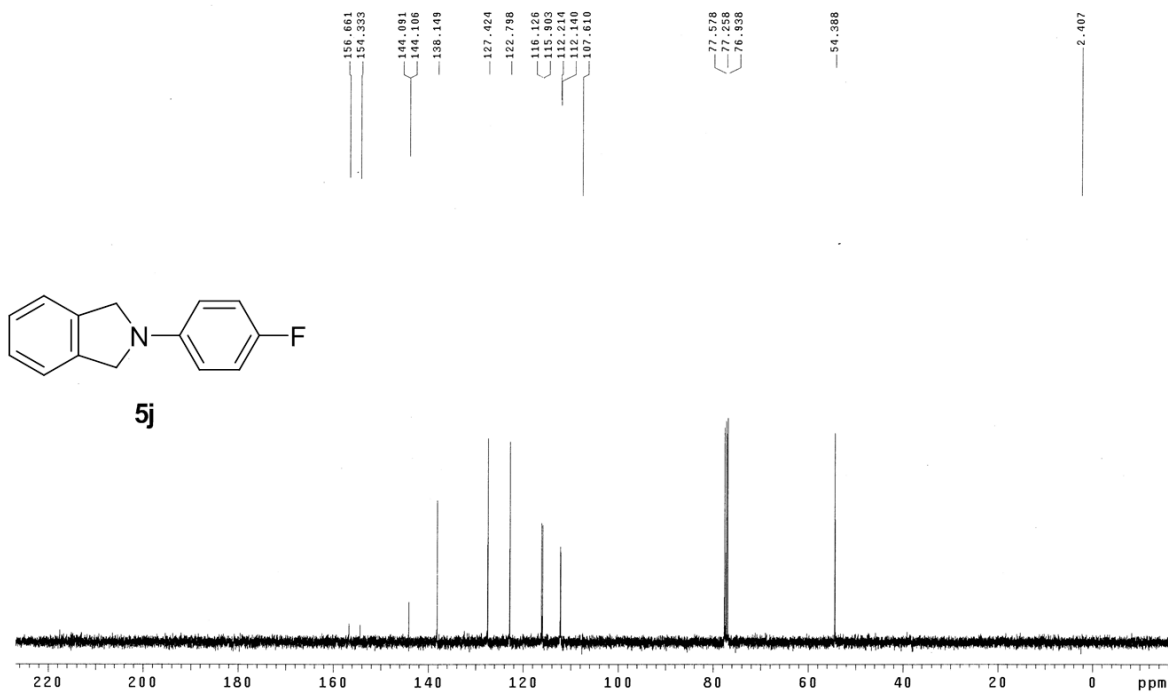

Supplement: c4cc04111a1.pdf [file c4cc04111a1.pdf]
